# Supplementary material
Source: PubMed Central journal article supplement (PMC9012132)
Supplement: NIHMS1794605-supplement-All_Supplementary_Materials.pdf [file NIHMS1794605-supplement-All_Supplementary_Materials.pdf]

## Supporting Information

### New design rules for developing potent, cell-active inhibitors of the Nucleosome Remodeling Factor (NURF) via BPTF bromodomain inhibition

Huda Zahid,<sup>‡,a</sup> Caroline R. Buchholz,<sup>‡,b</sup> Manjulata Singh,<sup>c</sup> Michael F. Ciccone,<sup>d</sup> Alice Chan,<sup>e</sup> Stanley Nithianantham,<sup>f</sup> Ke Shi,<sup>g</sup> Hideki Aihara,<sup>g</sup> Marcus Fischer,<sup>f</sup> Ernst Schonbrunn,<sup>e</sup> Camila O. dos Santos,<sup>d</sup> Joseph W. Landry,<sup>c</sup> William C. K. Pomerantz<sup>\*,a,b</sup>

<sup>a</sup>Department of Chemistry, University of Minnesota, 207 Pleasant St. SE, Minneapolis, Minnesota 55455, United States

<sup>b</sup>Department of Medicinal Chemistry, University of Minnesota, 308 Harvard Street SE, Minneapolis, Minnesota 55455, United States

<sup>c</sup>The Department of Human and Molecular Genetics, VCU Institute of Molecular Medicine, Massey Cancer Center, Virginia Commonwealth University, Richmond, Virginia 23298, United States

<sup>d</sup>Cold Spring Harbor Laboratory, 1 Bungtown Road, Cold Spring Harbor, NY 11724, United States

<sup>e</sup>Drug Discovery Department, H. Lee Moffitt Cancer Center and Research Institute, 12902 Magnolia Drive, Tampa, Florida 33612, United States

<sup>f</sup>Department of Chemical Biology & Therapeutics, St. Jude Children's Research Hospital, Memphis, TN 38105, United States; and Department of Structural Biology, St. Jude Children's Research Hospital, Memphis, TN 38105, United States

<sup>g</sup>Department of Biochemistry, Molecular Biology, and Biophysics, University of Minnesota, 321 Church St. SE, Minneapolis, Minnesota 55455, United States

<sup>‡</sup>These authors contributed equally to the manuscript.

Corresponding Author: \*William C.K. Pomerantz, email: wcp@umn.edu

## Contents

|                                                                                       |    |
|---------------------------------------------------------------------------------------|----|
| <b>PrOF NMR titration of 4,5-dichloropyridazinone with 5FW-BPTF</b> .....             | 2  |
| <b>AlphaScreen titrations of small molecules</b> .....                                | 2  |
| <b>Cocrystal structures of BPTF with compounds 1-4 and 11</b> .....                   | 4  |
| <b>Solubility tests for compounds 18 (BZ1), 19 and 20 in PBS</b> .....                | 7  |
| <b>BROMOScan data</b> .....                                                           | 8  |
| <b>Cell culture data</b> .....                                                        | 11 |
| <b>Analytical HPLC traces of compounds 18-20</b> .....                                | 14 |
| <b>X-ray Crystallography statistics</b> .....                                         | 14 |
| <b><sup>1</sup>H and <sup>13</sup>C NMR spectra of small molecule analogues</b> ..... | 18 |
| <b>References</b> .....                                                               | 43 |

No unexpected or unusually high safety hazards were encountered in the experimental methods used for this manuscript.

### PrOF NMR titration of 4,5-dichloropyridazinone with 5FW-BPTF

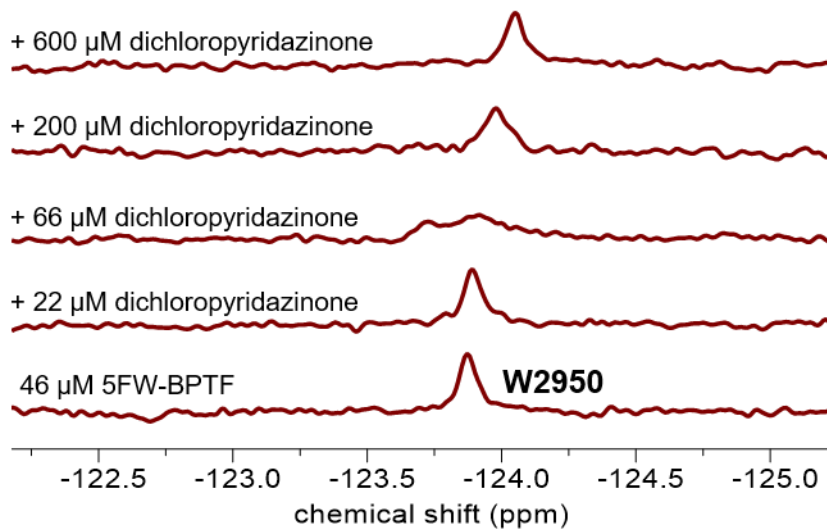

Figure S1: PrOF NMR titration of 4,5-dichloropyridazinone with 5FW-BPTF.

### AlphaScreen titrations of small molecules

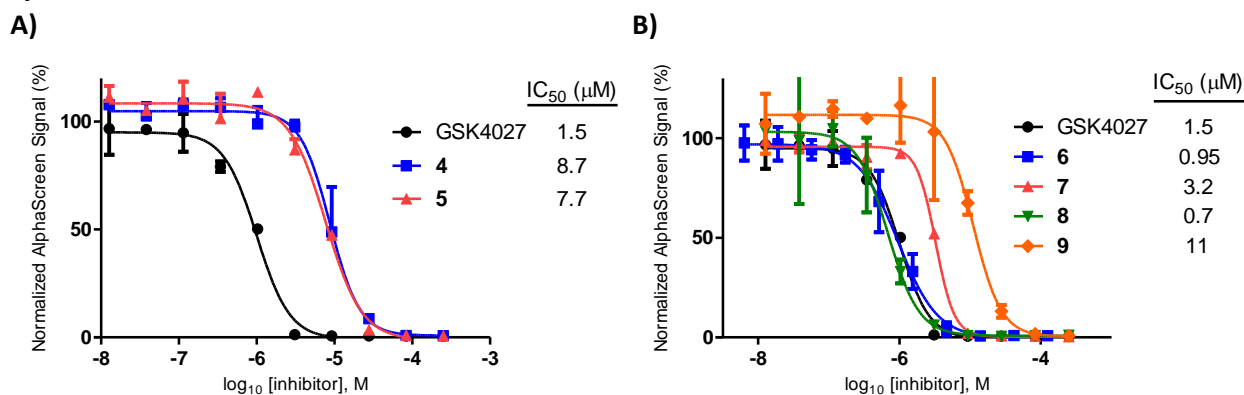

Figure S2: AlphaScreen titration of BPTF with compounds from **A)** Table 1 and **B)** Table 2

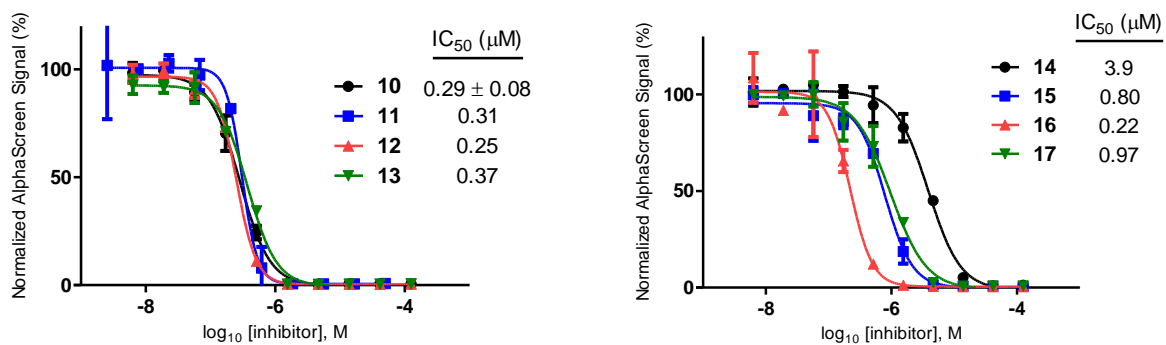

Figure S3: AlphaScreen titration of BPTF with compounds from Table 3

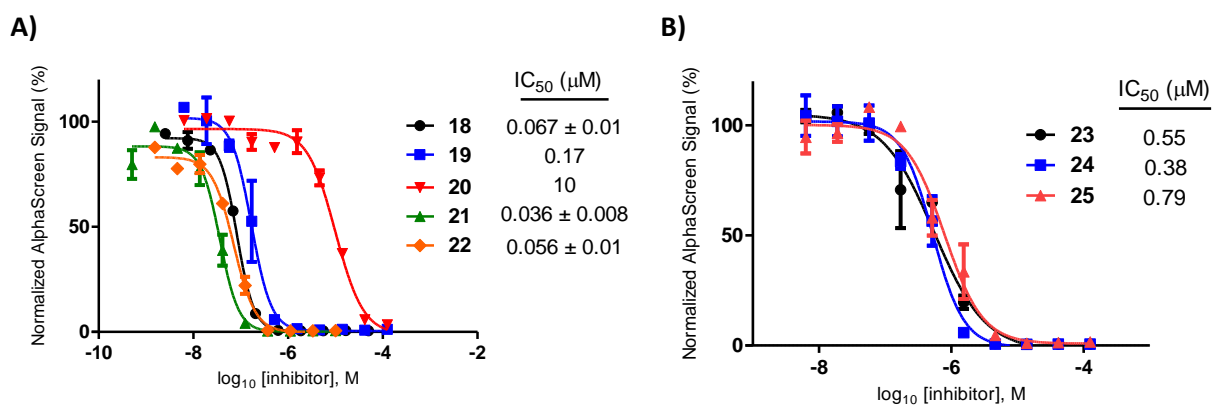

Figure S4: AlphaScreen titration of BPTF with compounds from A) Table 4 and B) Table 5

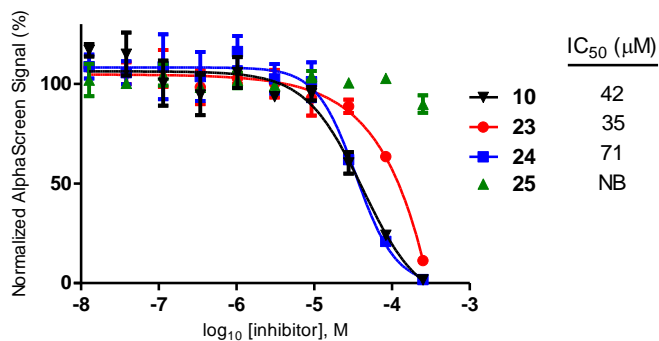

Figure S5: AlphaScreen titration of BRD4 D1 with compounds from Table 5

### Cocrystal structures of BPTF with compounds 1-4 and 11

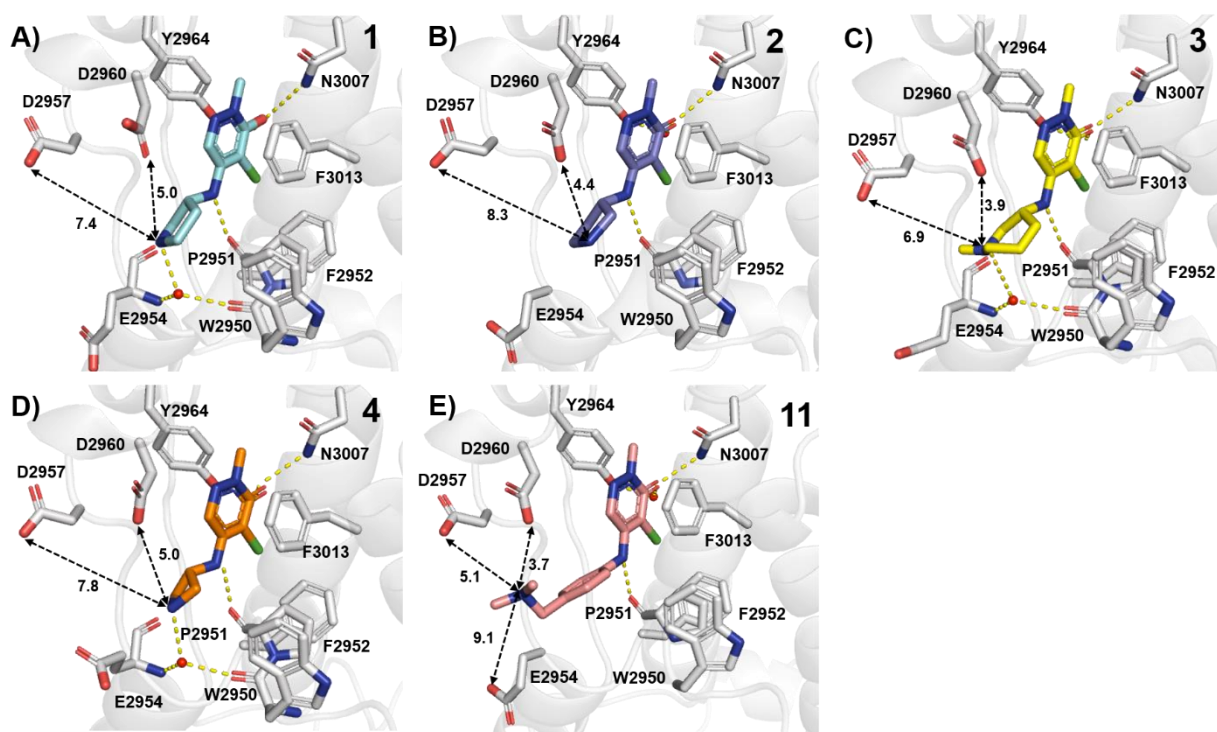

Figure S6: BPTF bromodomain (gray) cocrystal structures with **A) 1** (PDB: 7LPK, 1.39 Å resolution), **B) 2** (PDB: 7LRK, 1.44 Å resolution), **C) 3** (PDB: 7LPO, 1.66 Å resolution), **D) 4** (PDB: 7LRO, 1.45 Å resolution) and **E) 11** (PDB: 7RWN, 1.39 Å resolution). Hydrogen bonds are shown as yellow dashed lines. The distances (Å) between key residues are indicated. Three of the conserved structured waters are excluded for clarity.

A)

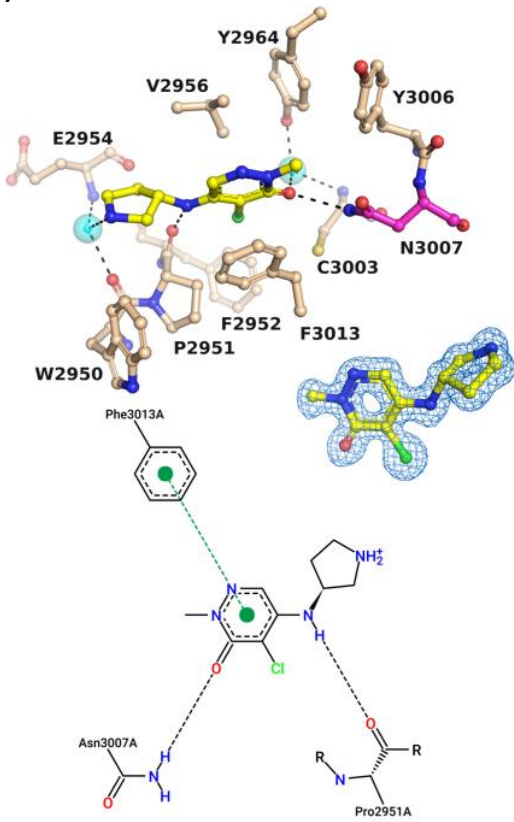

B)

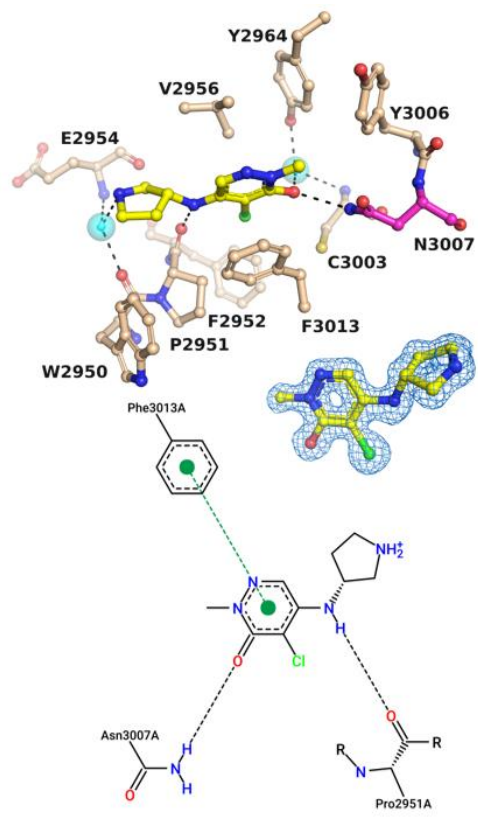

C)

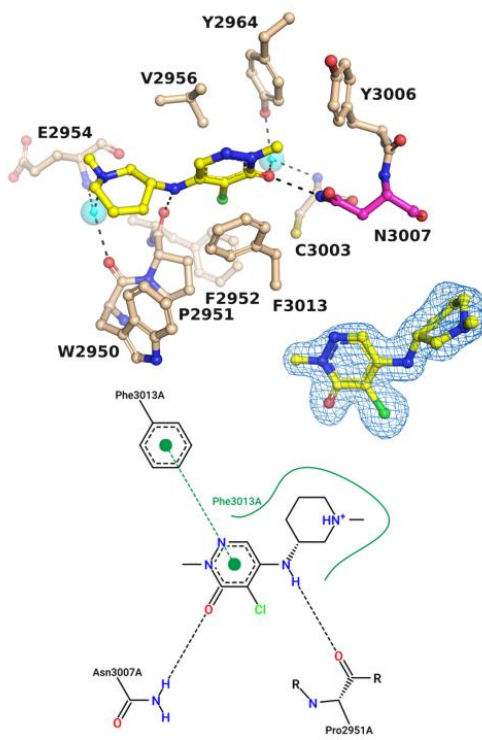

D)

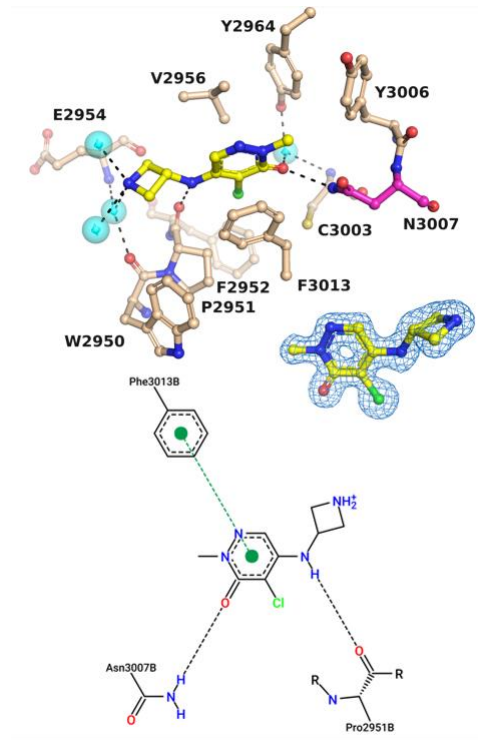

Figure S7: BPTF bromodomain (beige) cocrystal structures with small molecules **A) 1** (PDB: 7LPK, 1.39 Å resolution), **B) 2** (PDB: 7LRK, 1.44 Å resolution), **C) 3** (PDB: 7LPO, 1.66 Å resolution) and **D) 4** (PDB: 7LRO, 1.45 Å resolution) in yellow. Bound waters indicated by cyan spheres. Blue mesh around the inhibitor shows the corresponding 2Fo-Fc electron density map contoured at  $1\sigma$ . Water-mediated H-bonds are excluded from the interaction schematics for clarity.

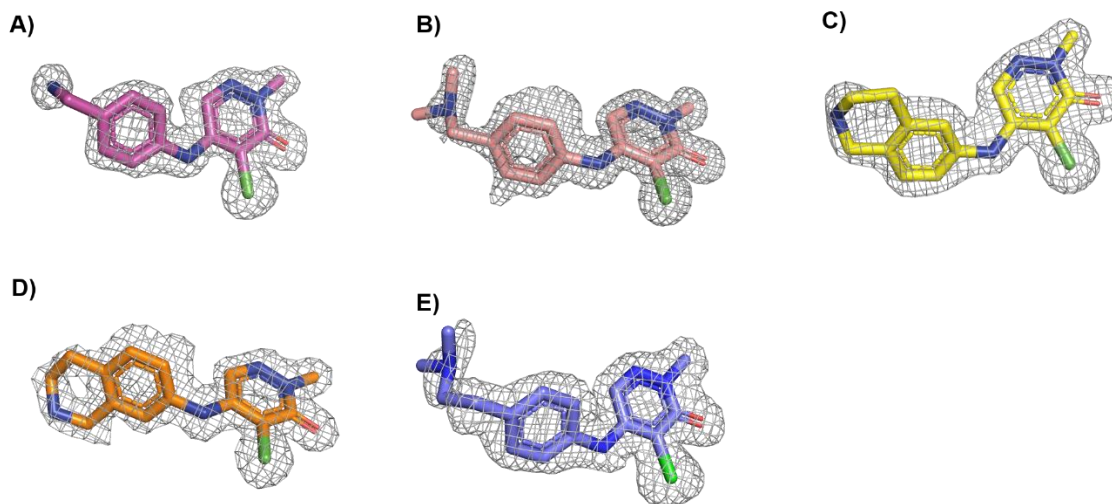

Figure S8: BPTF bromodomain (gray) cocrystal structures with **A) 10** (PDB: 7RWP), **B) 11** (PDB: 7RWN), **C) 12** (PDB: 7RWQ), **D) 13** (PDB: 7RWO), and **E) 19** (PDB: 7M2E). Gray mesh around the ligand shows the corresponding 2Fo-Fc electron density map contoured at  $1\sigma$ .

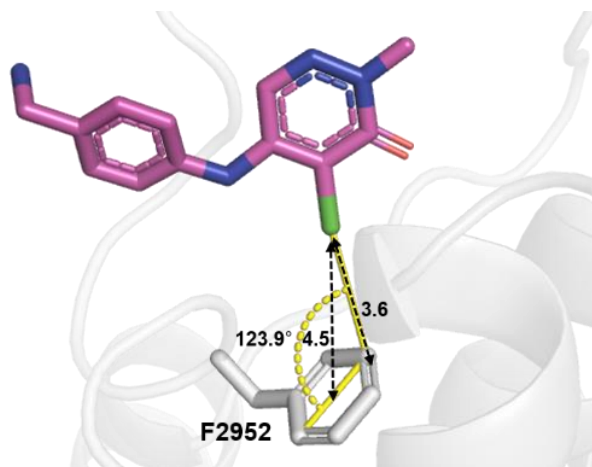

Figure S9: BPTF bromodomain (gray) cocrystal structure with **10**. The distances between the chlorine on **10** and the aromatic ring of F2952 are indicated, as well as the angle between chlorine and the ring plane. (PDB: 7RWP, 1.73 Å resolution).

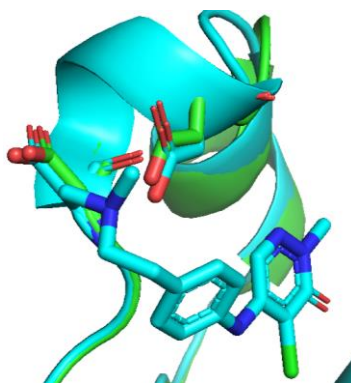

Figure S10: Overlay of apo structure of BPTF (PDB: 3UV2, green) with **19** (PDB: 7M2E, cyan).

### Solubility tests for compounds **18** (BZ1), **19** and **20** in PBS

A)

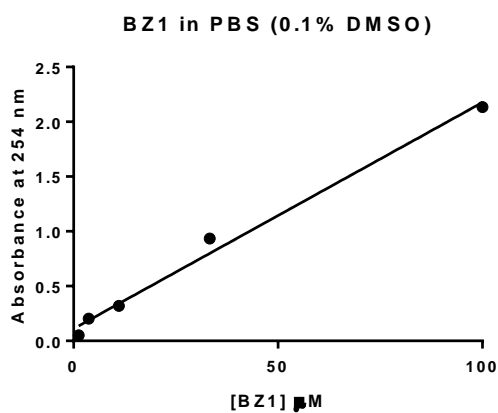

B)

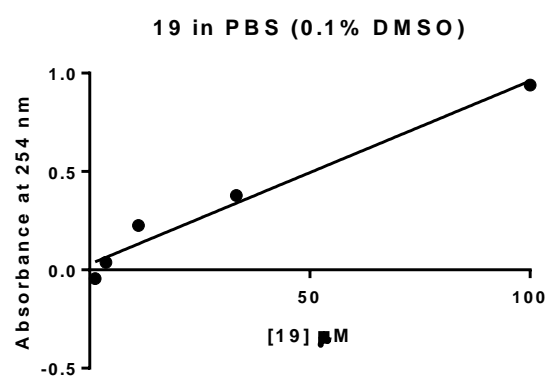

C)

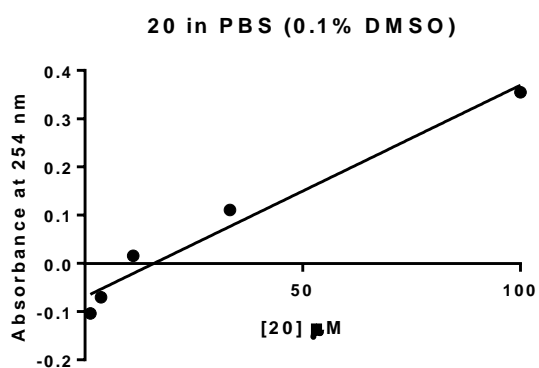

Figure S11: Solubility test by UV-Vis of compounds **A) BZ1**, **B) 19**, **C) 20** up to 100  $\mu\text{M}$  in 0.1% DMSO in Phosphate Buffered Saline (PBS) at 254 nm.

**BROMOscan data**Table S1: BROMOscan single point measurements at 140 nM **18 (BZ1)**

| DiscoverX Gene Symbol | Entrez Gene Symbol | Percent Control |
|-----------------------|--------------------|-----------------|
| ATAD2A                | ATAD2              | 53              |
| ATAD2B                | ATAD2B             | 73              |
| BAZ2A                 | BAZ2A              | 63              |
| BAZ2B                 | BAZ2B              | 38              |
| BRD1                  | BRD1               | 24              |
| BRD2(1)               | BRD2               | 100             |
| BRD2(2)               | BRD2               | 65              |
| BRD3(1)               | BRD3               | 50              |
| BRD3(2)               | BRD3               | 89              |
| BRD4(1)               | BRD4               | 29              |
| BRD4(2)               | BRD4               | 63              |
| BRD7                  | BRD7               | 1.1             |
| BRD9                  | BRD9               | 1.3             |
| BRDT(1)               | BRDT               | 97              |
| BRDT(2)               | BRDT               | 66              |
| BRPF1                 | BRPF1              | 10              |
| BRPF3                 | BRPF3              | 41              |
| CECR2                 | CECR2              | 5.7             |
| CREBBP                | CREBBP             | 57              |
| EP300                 | EP300              | 51              |
| FALZ                  | BPTF               | 0               |
| GCN5L2                | KAT2A              | 34              |
| PBRM1(2)              | PBRM1              | 97              |
| PBRM1(5)              | PBRM1              | 100             |
| PCAF                  | KAT2B              | 0               |
| SMARCA2               | SMARCA2            | 88              |
| SMARCA4               | SMARCA4            | 85              |
| TAF1(2)               | TAF1               | 34              |
| TAF1L(2)              | TAF1L              | 69              |
| TRIM24(PHD,Bromo.)    | TRIM24             | 81              |
| TRIM33(PHD,Bromo.)    | TRIM33             | 58              |
| WDR9(2)               | BRWD1              | 88              |



A)

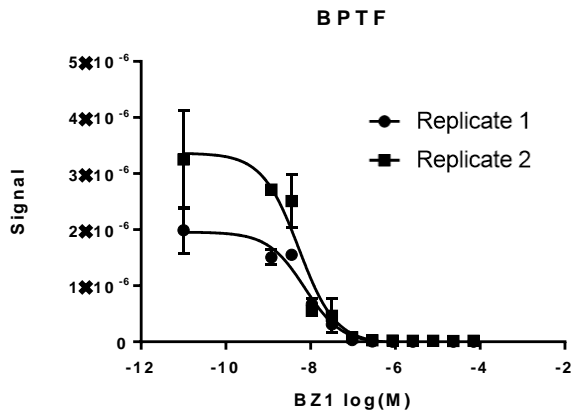

B)

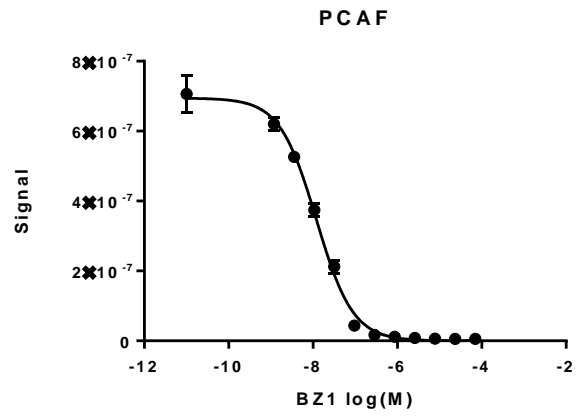

C)

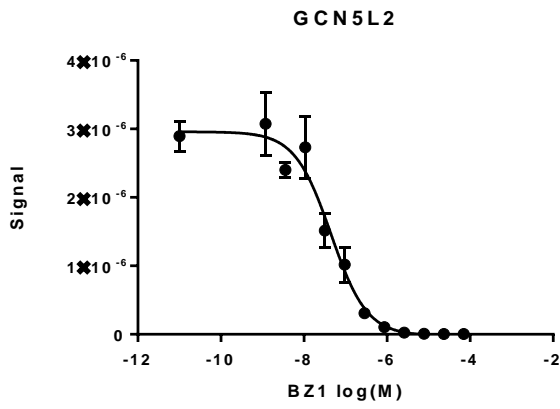

D)

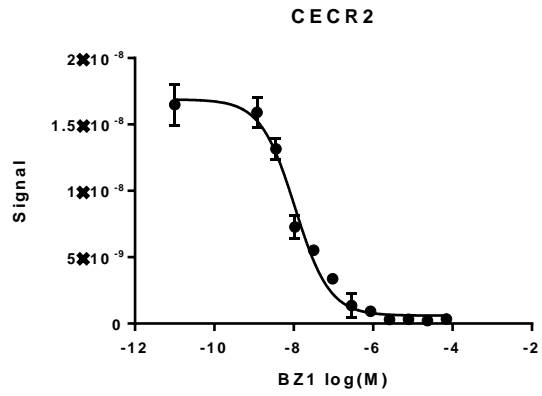

E)

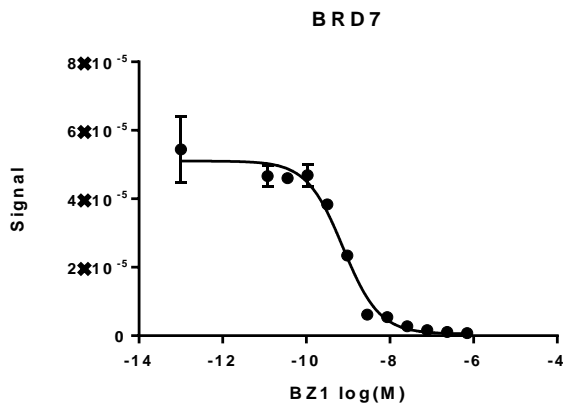

F)

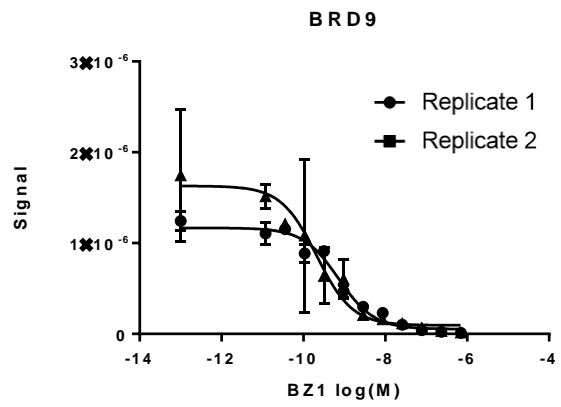

G)

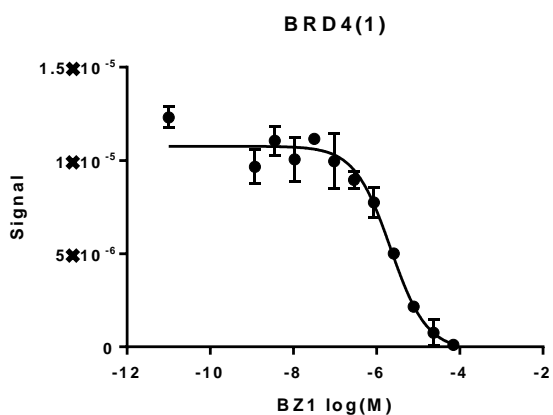

Figure S12: DiscoverX BROMOscan titrations of **BZ1** with **A)** BPTF, **B)** PCAF, **C)** GCN5L2, **D)** CECR2, **E)** BRD7, **F)** BRD9 and **G)** BRD4 (1). Annotations replicate 1 and 2 in the graph legend indicate the two experimental replicates.

A)

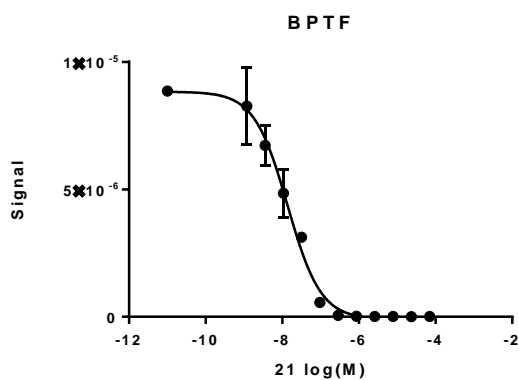

B)

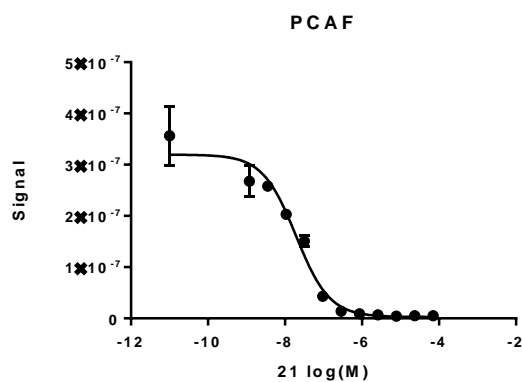

C)

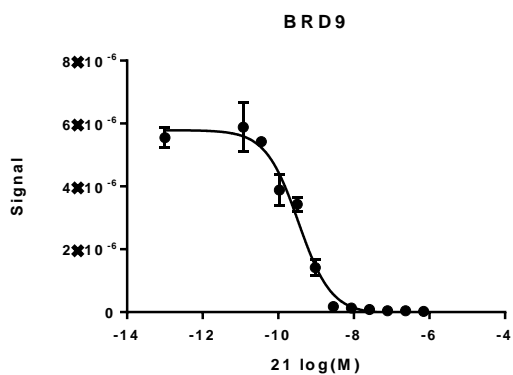

Figure S13: DiscoverX BROMOscan titrations of **21** with **A)** FALZ (BPTF) **B)** PCAF and **C)** BRD9 bromodomains.

A)

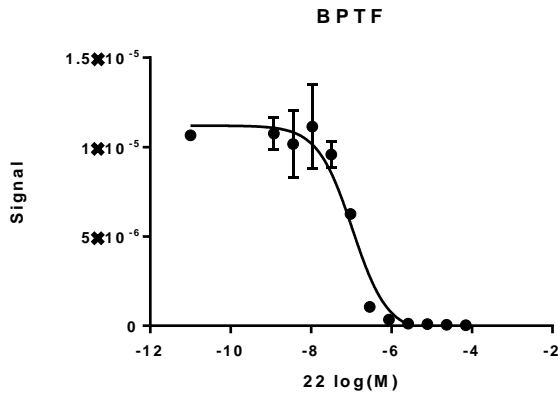

B)

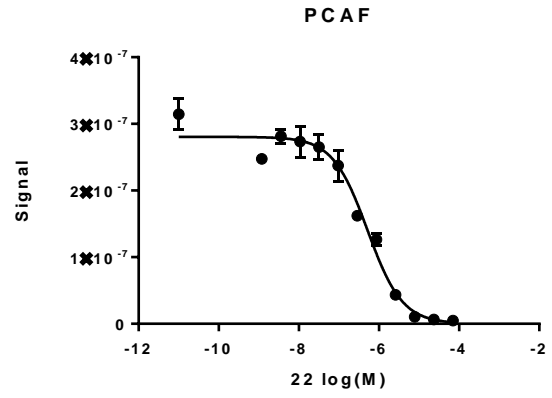

C)

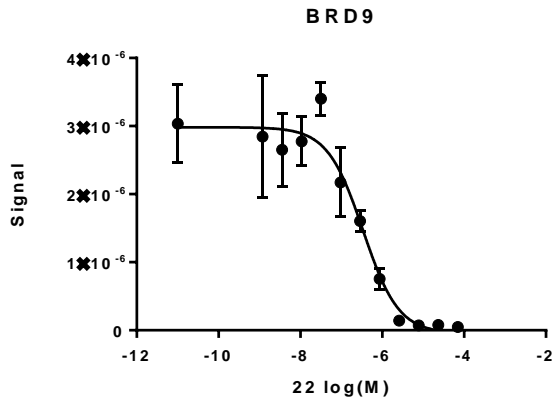

Figure S14: DiscoverX BROMOScan titrations of **22** with **A)** FALZ (BPTF) **B)** PCAF and **C)** BRD9 bromodomains.

A)

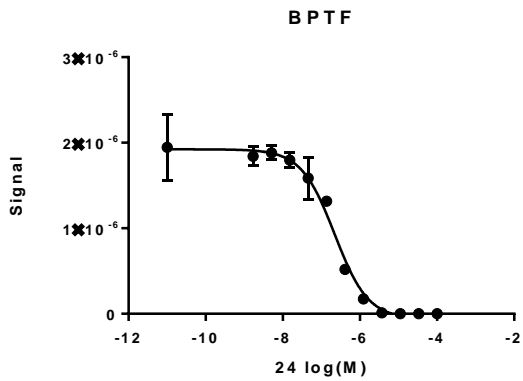

B)

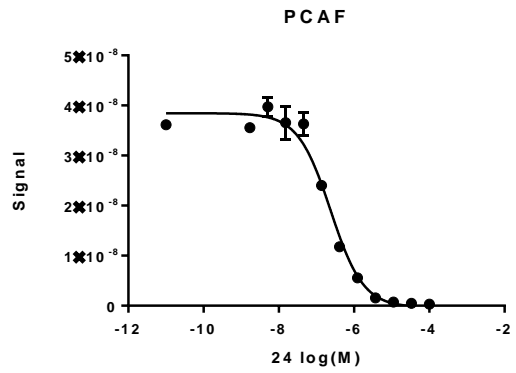

Figure S15: DiscoverX BROMOScan titrations of **24** with **A)** FALZ (BPTF) and **B)** PCAF bromodomains.

### Cell culture data

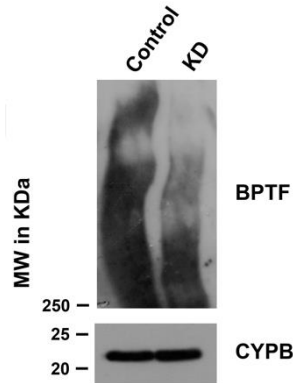

Figure S16: Western blot showing BPTF KD in 4T1 cells, methods previously reported by Mayes et al.<sup>1</sup>

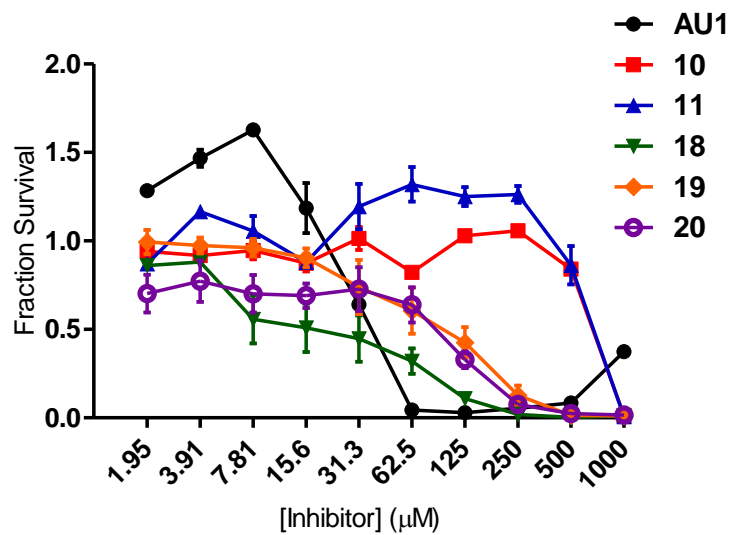

Figure S17: MTS assay with AU1 and pyridazinone inhibitors **10**, **11**, **18 (BZ1)**, **19** and **20**.

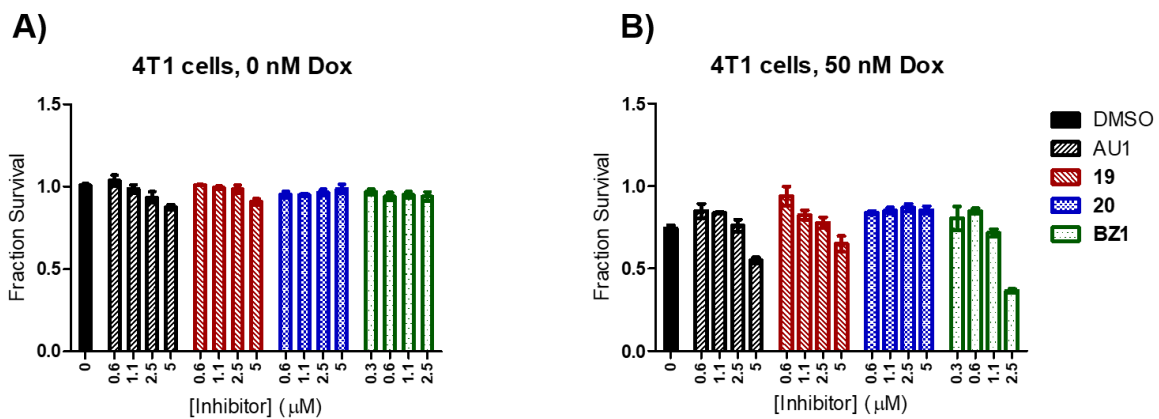

Figure S18: 4T1 cells were tested with AU1 and pyridazinone inhibitors **19**, **20** and **BZ1** at lower concentrations than in Figure 6. **A)** without doxorubicin **B)** in the presence of 50 nM doxorubicin. Fraction survival values are averages of three experimental replicates, except DMSO controls which are averages of nine experimental replicates.

Table S2: RNA-seq data from prior BPTF KO studies<sup>2</sup>

| Gene          | fold-change | p-value     |
|---------------|-------------|-------------|
| <i>Sfn</i>    | 11.47661989 | 1.42E-05    |
| <i>Sprr1a</i> | 7.587300464 | 0.000137877 |
| <i>Myc</i>    | 2.255253239 | 0.093807516 |

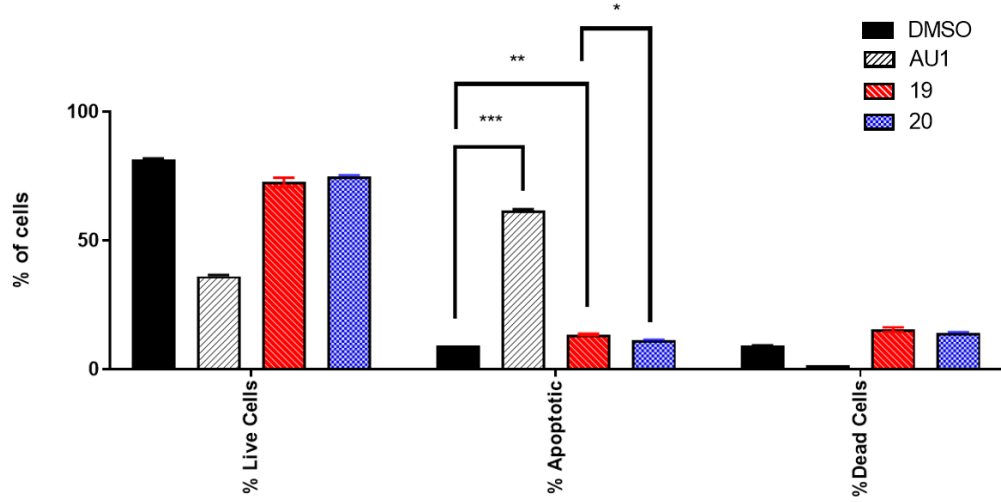

Figure S19: Viability analysis of Eph4 cells treated with 5  $\mu$ M compound or DMSO

DMSO vs AU1:  $p = .0001$

19 vs 20:  $p = .0253$

DMSO vs 19:  $p = .0042$

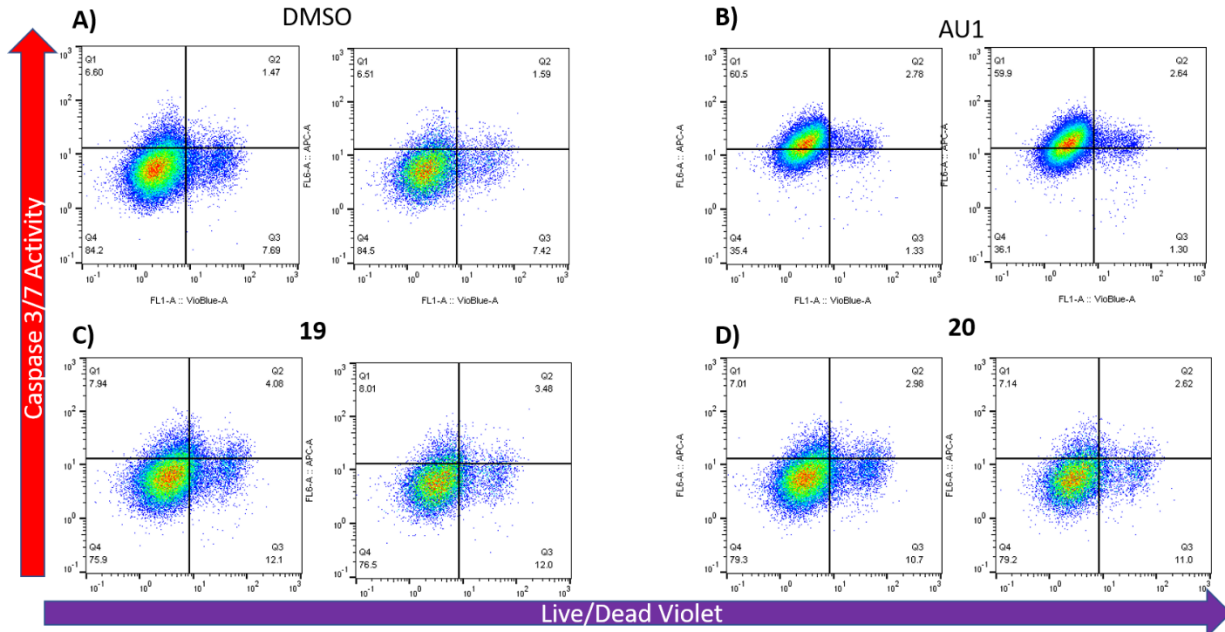

Figure S20: Caspase activation and viability analysis of Eph4 cells treated with 5  $\mu$ M compound or DMSO

## Analytical HPLC traces of compounds 18-20

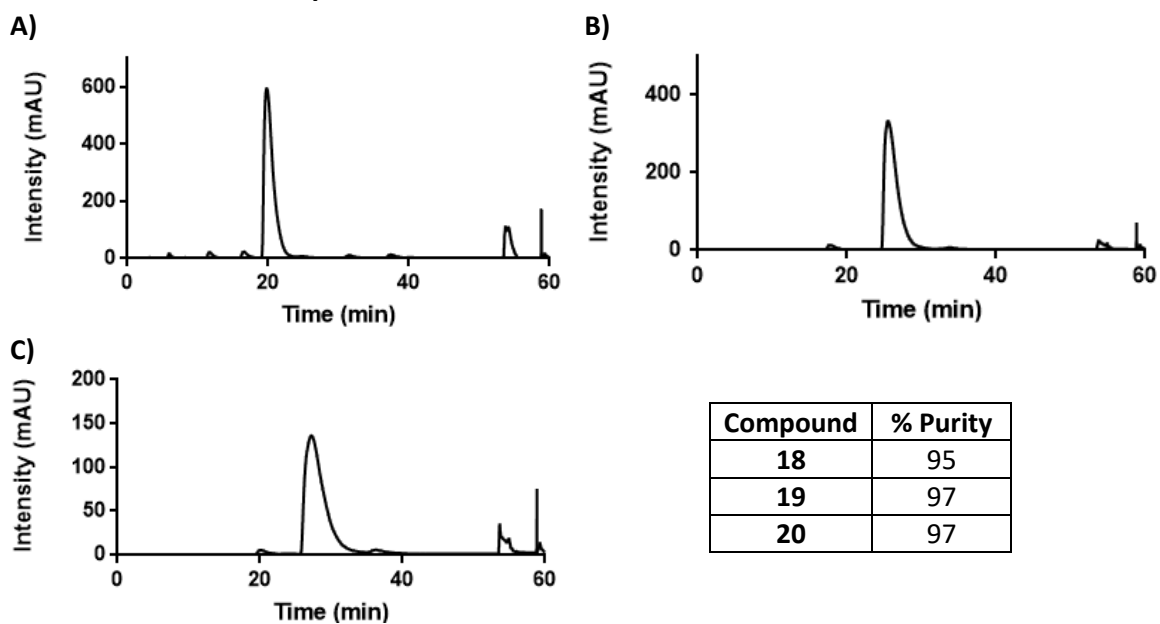

Figure S21: HPLC spectra at 272 nm of **A) 18**, **B) 19**, and **C) 20** over a gradient of 0-10% ACN in H<sub>2</sub>O with a calculated % purity from 0-50 min (excluding the solvent front).

## X-ray Crystallography statistics

Table S3: Data collection and refinement statistics for compounds 1-4

| Inhibitor                                |              | 3                            | 1                            | 2                            | 4                            |
|------------------------------------------|--------------|------------------------------|------------------------------|------------------------------|------------------------------|
| PDB ID                                   |              | 7LP0                         | 7LPK                         | 7LRK                         | 7LRO                         |
| <b>Data collection</b>                   |              |                              |                              |                              |                              |
| <b>Space group</b>                       |              | P1                           | P2 <sub>1</sub>              | P2 <sub>1</sub>              | P2 <sub>1</sub>              |
| <b>Unit cell dimensions</b>              | a            | 27.1                         | 58.4                         | 58.3                         | 58.4                         |
|                                          | b            | 35.6                         | 27.2                         | 27.1                         | 27.1                         |
|                                          | c            | 57.6                         | 76.9                         | 76.7                         | 76.9                         |
|                                          | $\alpha$     | 97.1                         | 90.0                         | 90.0                         | 90.0                         |
|                                          | $\beta$      | 103.6                        | 93.7                         | 93.7                         | 93.9                         |
|                                          | $\gamma$     | 94.3                         | 90.0                         | 90.0                         | 90.0                         |
| <b>Resolution range (Å)</b>              |              | 38.0 - 1.66<br>(1.70 - 1.66) | 38.4 - 1.39<br>(1.43 - 1.39) | 38.3 - 1.44<br>(1.48 - 1.44) | 38.1 - 1.45<br>(1.49 - 1.45) |
| <b>Unique reflections</b>                |              | 25204 (1843)                 | 48967 (3673)                 | 43465 (2851)                 | 43259 (3165)                 |
| <b>Rmeas (%)</b>                         |              | 10.9 (65.2)                  | 7.3 (58.5)                   | 7.1 (45.3)                   | 8.2 (58.6)                   |
| <b>CC1/2 (%)</b>                         |              | 99.3 (67.2)                  | 99.8 (74.4)                  | 99.8 (87.6)                  | 99.8 (78.2)                  |
| <b>Completeness (%)</b>                  |              | 94.7 (91.3)                  | 99.2 (99.8)                  | 98.3 (88.1)                  | 99.8 (99.7)                  |
| <b>I/<math>\sigma</math>I</b>            |              | 10.6 (3.0)                   | 14.1 (3.4)                   | 16.7 (3.6)                   | 14.0 (2.5)                   |
| <b>Structure refinement</b>              |              |                              |                              |                              |                              |
| <b>Rwork (%)</b>                         |              | 19.1 (33.3)                  | 19.0 (24.9)                  | 16.6 (22.6)                  | 15.9 (21.5)                  |
| <b>Rfree<sup>a</sup> (%)</b>             |              | 23.5 (41.8)                  | 20.4 (33.3)                  | 18.8 (26.5)                  | 19.1 (25.3)                  |
| <b>Wilson B (Å<sup>2</sup>)</b>          |              | 22.7                         | 9.8                          | 8.7                          | 9.2                          |
| <b>Average B (Å<sup>2</sup>)</b>         | all          | 27.8                         | 13.5                         | 11.7                         | 13.6                         |
|                                          | protein      | 27.5                         | 12.5                         | 10.5                         | 11.6                         |
|                                          | ligand       | 27.6                         | 12.4                         | 10.1                         | 11.6                         |
|                                          | solvent      | 31.7                         | 21.2                         | 19.7                         | 24.1                         |
| <b>rmsd<sup>b</sup> bond lengths (Å)</b> |              | 0.006                        | 0.005                        | 0.006                        | 0.005                        |
| <b>rmsd bond angles (deg)</b>            |              | 0.84                         | 0.76                         | 0.82                         | 0.83                         |
| <b>Ramachandran</b>                      | favoured (%) | 98.65                        | 100                          | 100                          | 100                          |
|                                          | allowed (%)  | 1.35                         | 0.0                          | 0.0                          | 0.0                          |
|                                          | outliers (%) | 0.0                          | 0.0                          | 0.0                          | 0.0                          |

Values in parenthesis are for the highest resolution bins.

<sup>a</sup> Rfree is Rcryst calculated for randomly chosen unique reflections.

<sup>b</sup> rmsd = root-mean-square deviation from ideal values.

Table S4: Data collection and refinement statistics for compounds **10-13**.

|                  | 10                                  | 11                               | 12                              | 13                                |
|------------------|-------------------------------------|----------------------------------|---------------------------------|-----------------------------------|
| PDB ID           | 7RWP                                | 7RWN                             | 7RWQ                            | 7RWO                              |
| Resolution range | 48.31 - 1.73<br>(1.792 -<br>1.73)   | 38.28 - 1.39<br>(1.44 -<br>1.39) | 35.61 - 1.9<br>(1.968 -<br>1.9) | 33.32 - 1.58<br>(1.636 -<br>1.58) |
| Space group      | P 2 21 21                           | P 1 21 1                         | P 2 21 21                       | P 1 21 1                          |
| Unit cell        | 27.131 66.337<br>70.506 90<br>90 90 | 27.148 66.854<br>39.706 90       | 27.18 66.346<br>71.216          | 27.098 66.638<br>39.288 90        |

|                                   |                     |                     |                     |                     |
|-----------------------------------|---------------------|---------------------|---------------------|---------------------|
|                                   |                     | 105.406<br>90       | 90 90<br>90         | 106.787<br>90       |
| Total reflections                 | 62016 (6463)        | 100196 (9373)       | 74932 (7559)        | 64535 (6691)        |
| Unique reflections                | 13659 (1383)        | 27024 (2710)        | 10647 (1044)        | 17736 (1788)        |
| Multiplicity                      | 4.5 (4.7)           | 3.7 (3.5)           | 7.0 (7.2)           | 3.6 (3.7)           |
| Completeness (%)                  | 98.08 (99.64)       | 98.18 (98.44)       | 99.31 (99.71)       | 96.46 (98.24)       |
| Mean I/sigma(I)                   | 10.69 (2.14)        | 11.04 (2.57)        | 9.43 (2.04)         | 9.37 (2.08)         |
| Wilson B-factor                   | 17.42               | 11.59               | 20.6                | 14.60               |
| R-merge                           | 0.1015 (0.6784)     | 0.07337<br>(0.4816) | 0.1636<br>(0.9022)  | 0.1067 (0.5826)     |
| R-meas                            | 0.114 (0.7611)      | 0.08561<br>(0.5697) | 0.1767<br>(0.9711)  | 0.1265 (0.6807)     |
| R-pim                             | 0.05057<br>(0.3354) | 0.04341<br>(0.2992) | 0.06546<br>(0.3538) | 0.06649<br>(0.3465) |
| CC1/2                             | 0.998 (0.783)       | 0.997 (0.762)       | 0.994 (0.666)       | 0.934 (0.737)       |
| CC*                               | 0.999 (0.937)       | 0.999 (0.93)        | 0.999 (0.894)       | 0.983 (0.921)       |
| Reflections used in<br>refinement | 13659 (1383)        | 27024 (2708)        | 10646 (1043)        | 17736 (1787)        |
| Reflections used for R-<br>free   | 1358 (137)          | 1985 (209)          | 1073 (106)          | 1771 (184)          |
| R-work                            | 0.2208 (0.2587)     | 0.1885 (0.2552)     | 0.2155<br>(0.3032)  | 0.1965 (0.2920)     |
| R-free                            | 0.2693 (0.3355)     | 0.2133 (0.3002)     | 0.2575<br>(0.3559)  | 0.2278 (0.3213)     |
| CC(work)                          | 0.942 (0.873)       | 0.955 (0.852)       | 0.948 (0.744)       | 0.930 (0.759)       |
| CC(free)                          | 0.911 (0.772)       | 0.941 (0.831)       | 0.880 (0.725)       | 0.835 (0.732)       |
| Number of non-<br>hydrogen atoms  | 1052                | 1140                | 1056                | 1109                |
| macromolecules                    | 983                 | 1008                | 996                 | 1019                |
| ligands                           | 19                  | 20                  | 21                  | 20                  |
| solvent                           | 50                  | 112                 | 39                  | 70                  |
| Protein residues                  | 117                 | 120                 | 119                 | 120                 |
| RMS(bonds)                        | 0.007               | 0.007               | 0.008               | 0.006               |
| RMS(angles)                       | 1.12                | 0.93                | 1.01                | 0.78                |
| Ramachandran<br>favored (%)       | 100.00              | 99.15               | 99.14               | 99.15               |
| Ramachandran<br>allowed (%)       | 0.00                | 0.85                | 0.86                | 0.85                |
| Ramachandran<br>outliers (%)      | 0.00                | 0                   | 0                   | 0.00                |
| Rotamer outliers (%)              | 0.00                | 0                   | 0.88                | 2.59                |
| Clashscore                        | 2.04                | 0.99                | 4.02                | 2.45                |
| Average B-factor                  | 18.69               | 14.93               | 22.14               | 16.32               |
| macromolecules                    | 18.46               | 14.17               | 22.15               | 16.09               |
| ligands                           | 26.57               | 19.51               | 23.17               | 17.37               |



|         |       |      |       |       |
|---------|-------|------|-------|-------|
| solvent | 20.11 | 20.9 | 21.23 | 19.49 |
|---------|-------|------|-------|-------|

Statistics for the highest-resolution shell are shown in parentheses.

Table S5: Data collection and refinement statistics for compound **19**.

|                                               | <b>19</b>                 |
|-----------------------------------------------|---------------------------|
| <b>PDB ID</b>                                 | 7M2E                      |
| <b>Data collection</b>                        |                           |
| Resolution range                              | 33.1 - 1.75 (1.81 - 1.75) |
| Wavelength (Å)                                | 1.000                     |
| Space group                                   | <i>P</i> 2 <sub>1</sub>   |
| Unit cell (Å): <i>a</i> , <i>b</i> , <i>c</i> | 27.01, 66.55, 39.62       |
| (°): β                                        | 105.61                    |
| Total number of observed reflections          | 47148 (4142)              |
| Unique reflections                            | 12317 (1033)              |
| Average mosaicity                             | 0.56                      |
| Multiplicity                                  | 3.8 (2.9)                 |
| Completeness (%)                              | 90.33 (75.90)             |
| Mean <i>I</i> /σ( <i>I</i> )                  | 9.6 (2.5)                 |
| Wilson B-factor                               | 20.1                      |
| <i>R</i> <sub>merge</sub> <sup>a</sup>        | 0.148 (0.391)             |
| <b>Structure refinement</b>                   |                           |
| <i>R</i> <sub>work</sub>                      | 0.167 (0.199)             |
| <i>R</i> <sub>free</sub>                      | 0.215 (0.253)             |
| Molecules per asymmetric unit                 | 1                         |
| Number of non-hydrogen atoms                  | 1179                      |
| macromolecules                                | 993                       |
| Ligand (CB02-092)                             | 21                        |
| Solvent                                       | 165                       |
| Protein residues                              | 121                       |
| RMS bond lengths (Å)                          | 0.007                     |
| RMS bond angles (°)                           | 0.81                      |
| Ramachandran favored (%)                      | 100.0                     |
| Ramachandran allowed (%)                      | 0.0                       |
| Ramachandran outliers (%)                     | 0.0                       |
| Rotamer outliers (%)                          | 0.92                      |
| Clashscore                                    | 0.51                      |
| <b>Mean <i>B</i> values (Å<sup>2</sup>)</b>   |                           |
| Overall                                       | 23.4                      |
| macromolecules                                | 22.0                      |
| Ligand (CB02-092)                             | 26.4                      |
| Solvent                                       | 31.3                      |

Parentheses numbers represent the highest-resolution shell.

$$^a R_{\text{merge}} = \frac{\sum_{hkl} \sum_i |I_i(hkl) - I_{\text{av}}(hkl)|}{\sum_{hkl} \sum_i I_i(hkl)}.$$

# <sup>1</sup>H and <sup>13</sup>C NMR spectra of small molecule analogues

4, <sup>1</sup>H NMR (400 MHz, DMSO-d<sub>6</sub>)

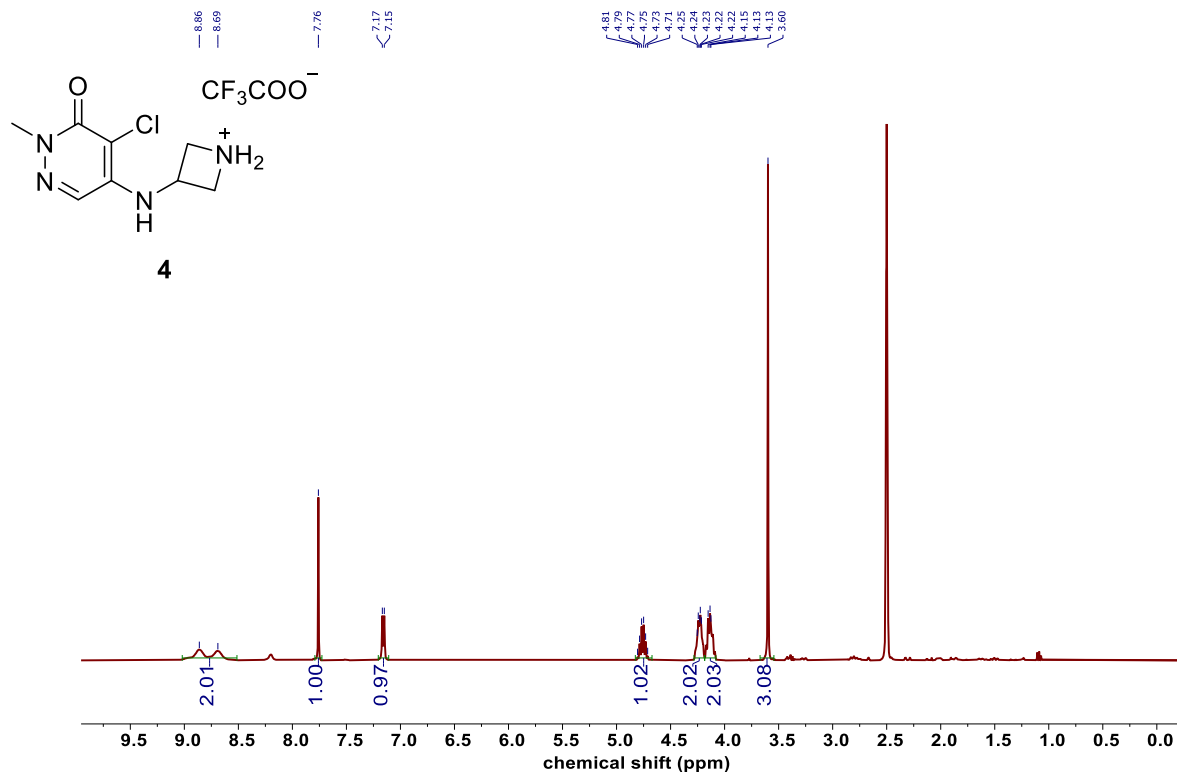

4, <sup>13</sup>C NMR (126 MHz, DMSO-d<sub>6</sub>)

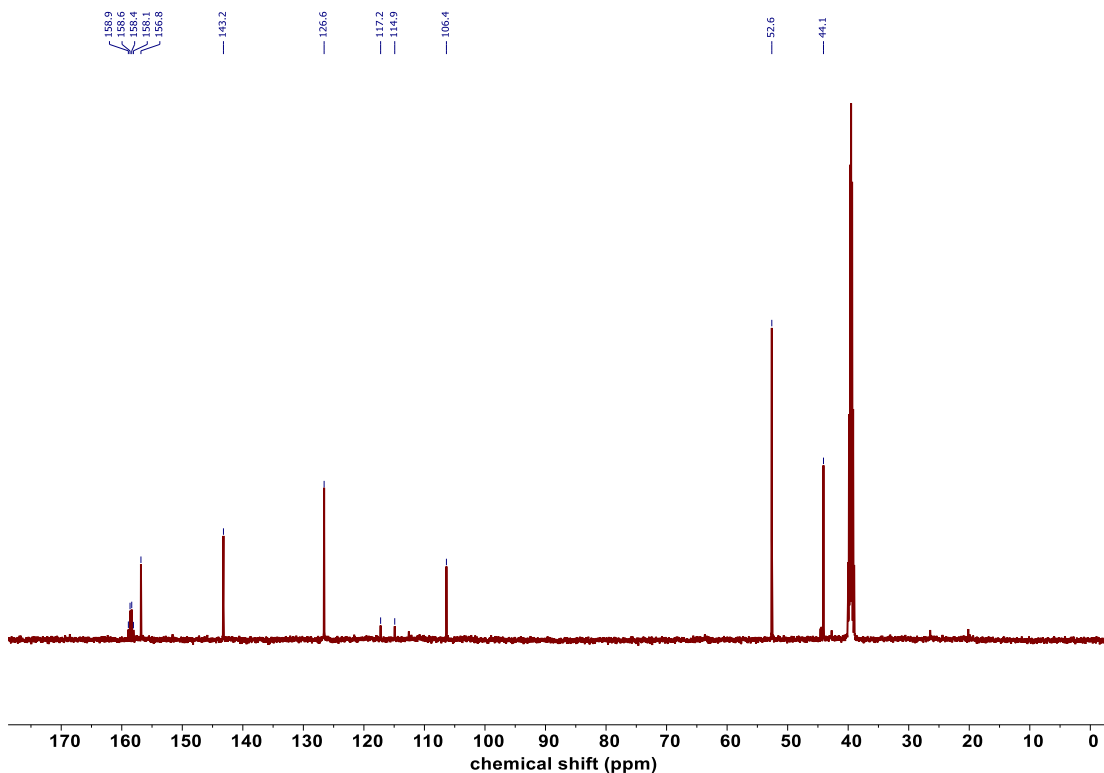

5, <sup>1</sup>H NMR (500 MHz, DMSO-d<sub>6</sub>)

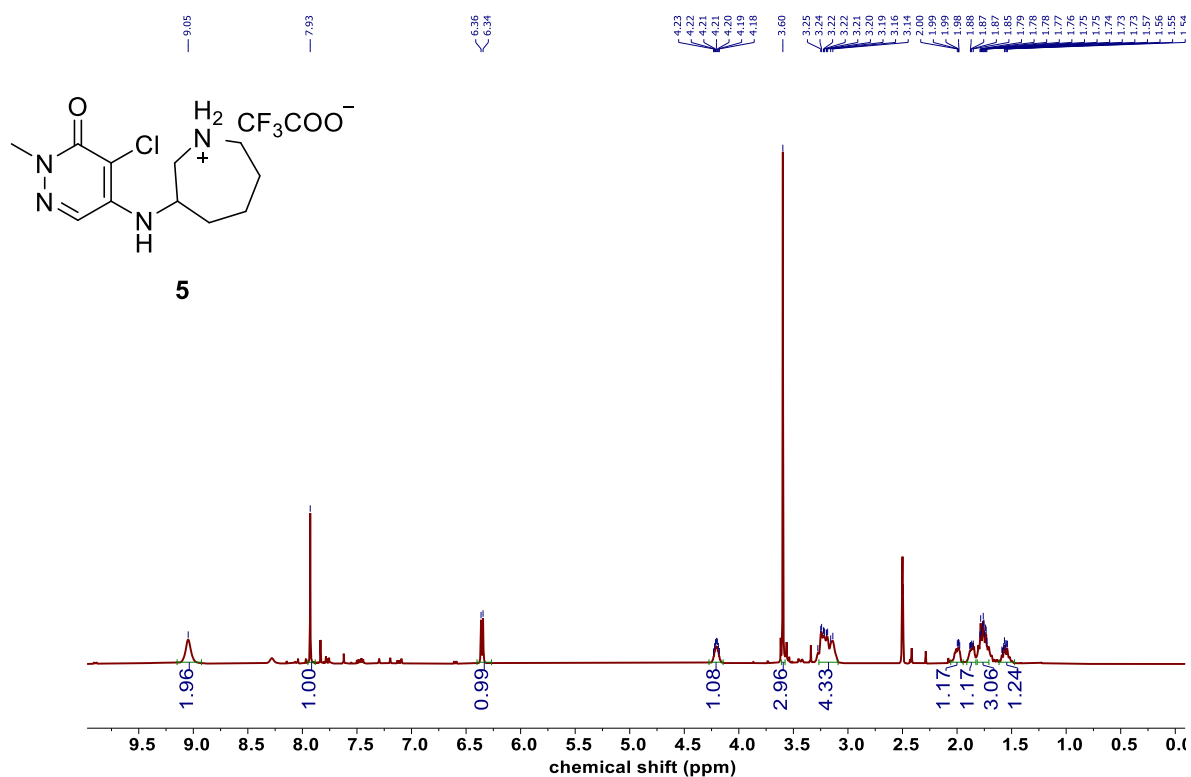

5, <sup>13</sup>C NMR (126 MHz, DMSO-d<sub>6</sub>)

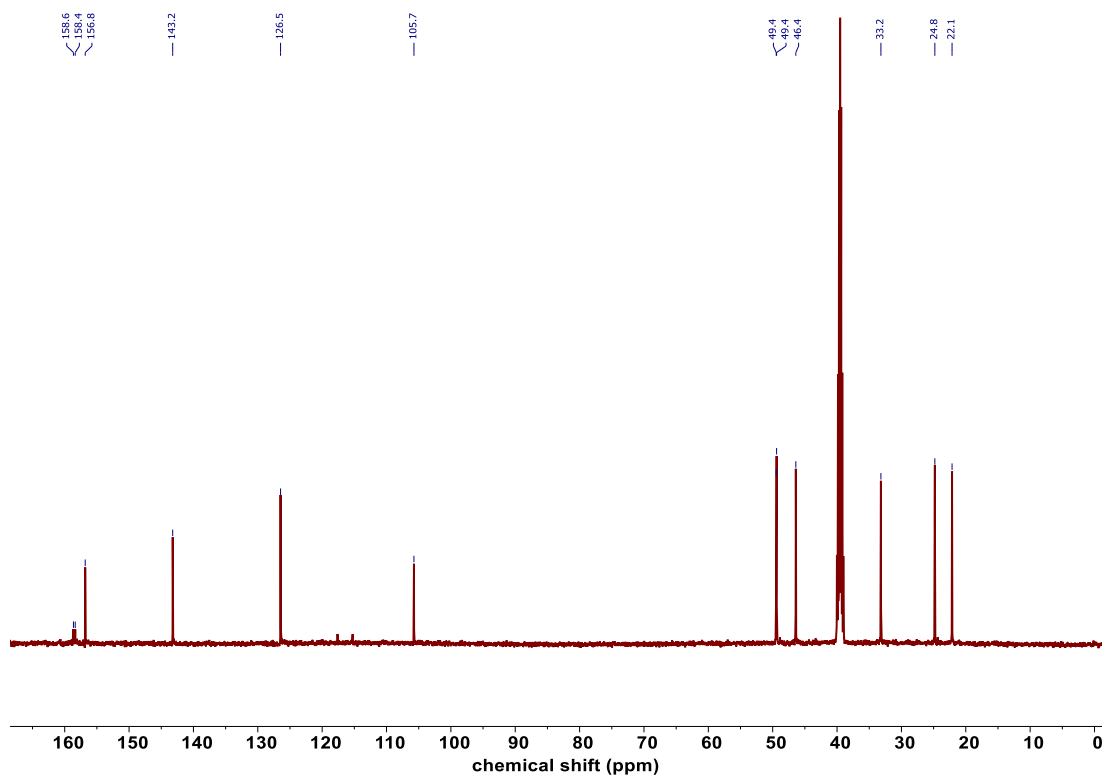

6, <sup>1</sup>H NMR (500 MHz, DMSO-d<sub>6</sub>)

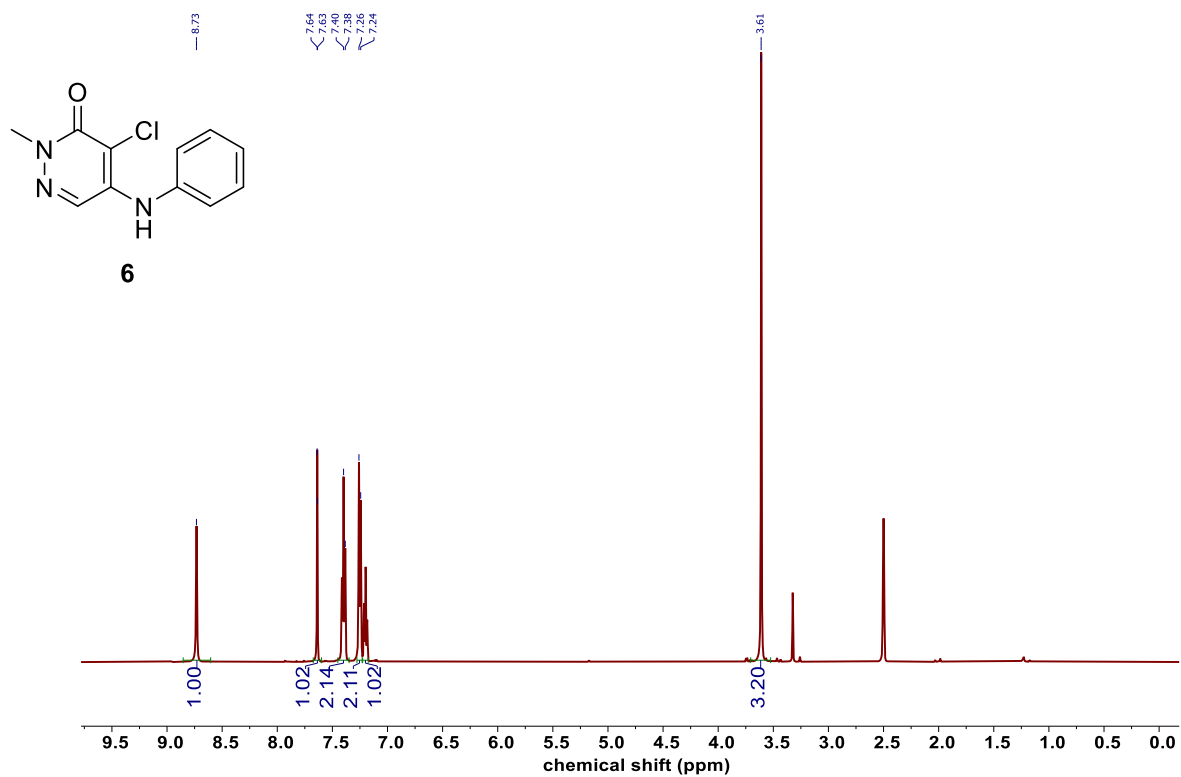

6, <sup>13</sup>C NMR (126 MHz, DMSO-d<sub>6</sub>)

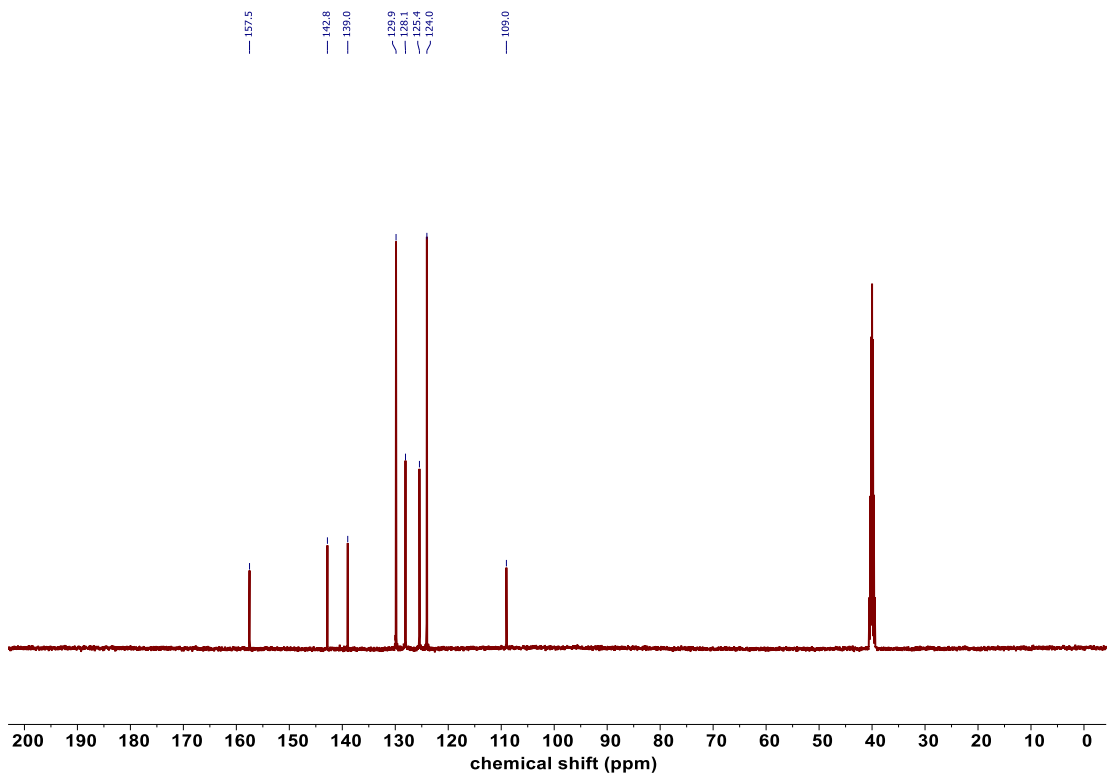

7, <sup>1</sup>H NMR (500 MHz, Methanol-d<sub>4</sub>)

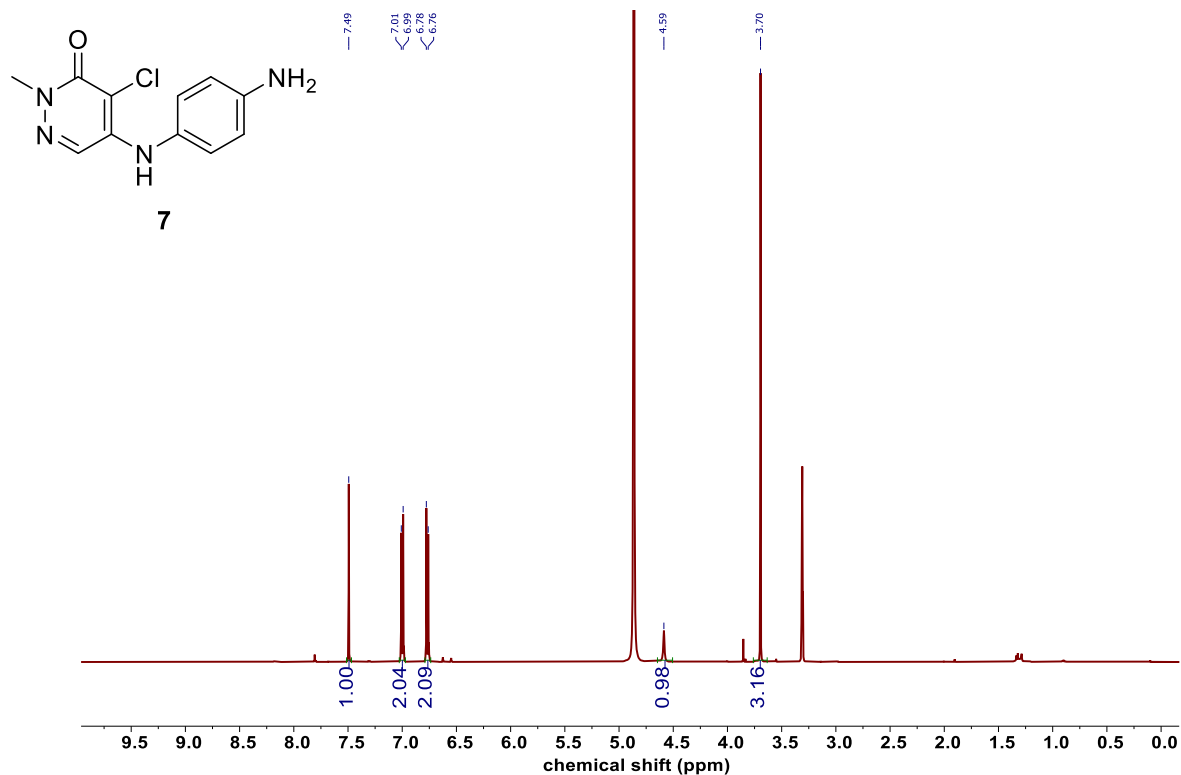

7, <sup>13</sup>C NMR (126 MHz, Methanol-d<sub>4</sub>)

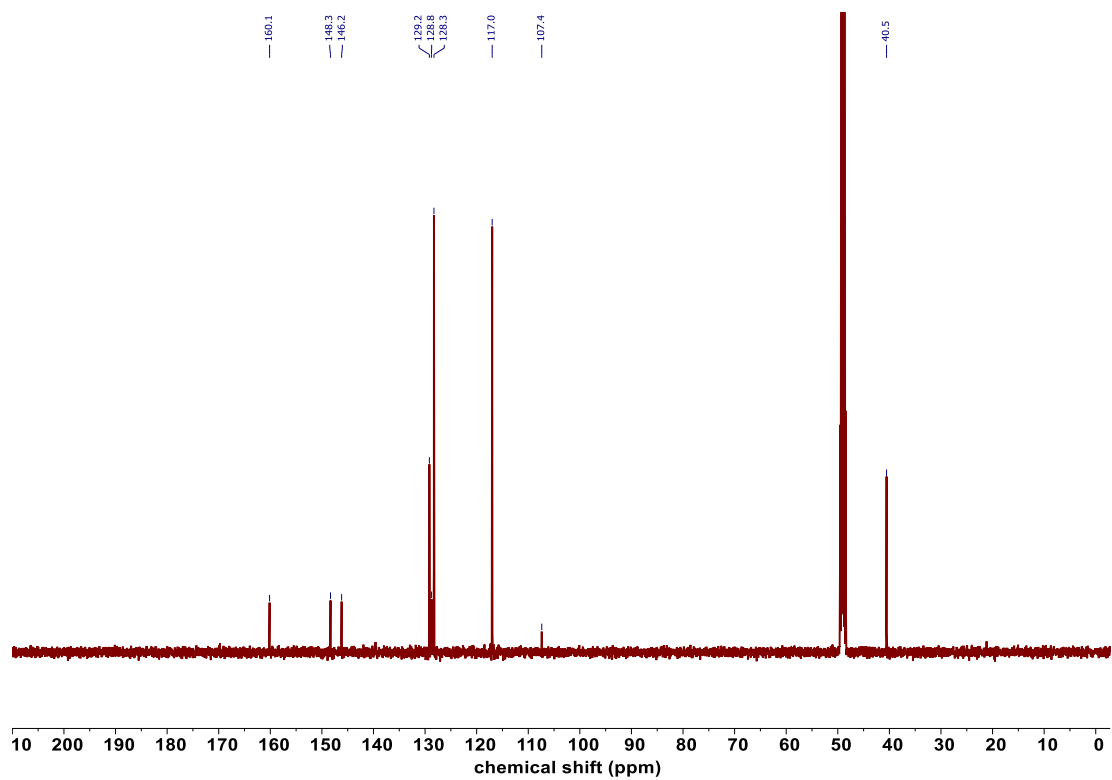

**8**,  $^1\text{H}$  NMR (500 MHz,  $\text{DMSO-}d_6$ )

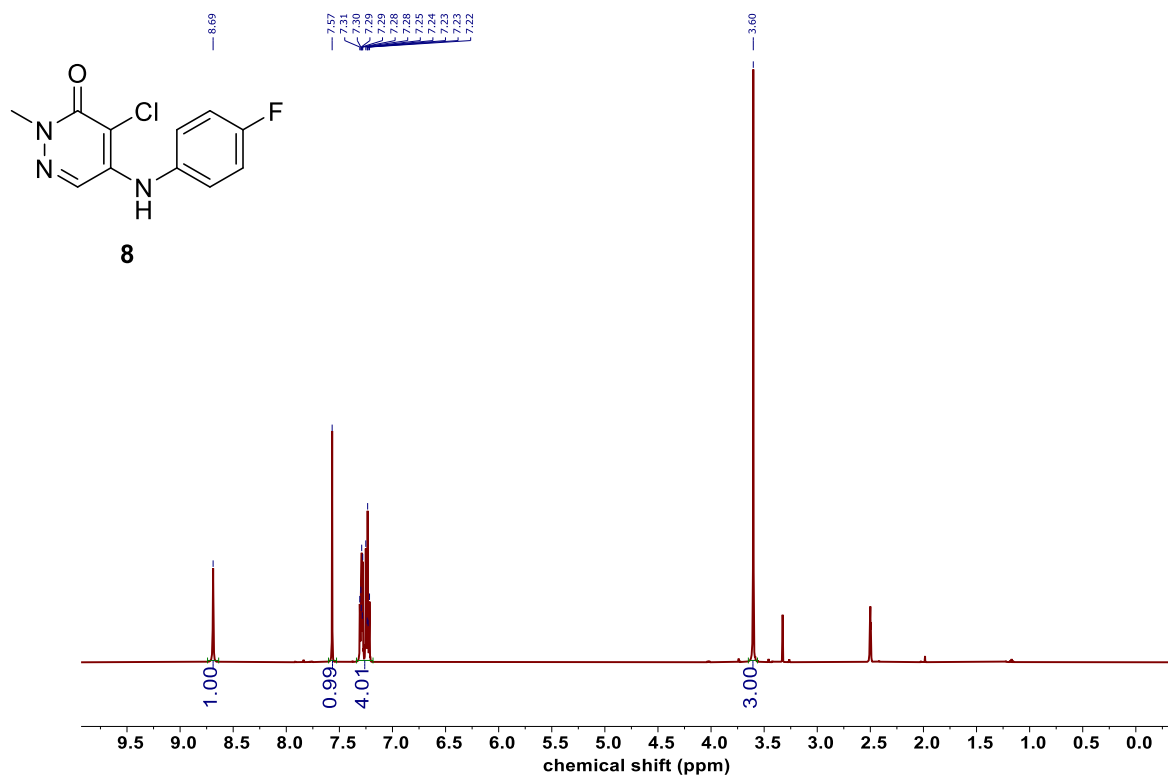

**8**,  $^{13}\text{C}$  NMR (126 MHz,  $\text{DMSO-}d_6$ )

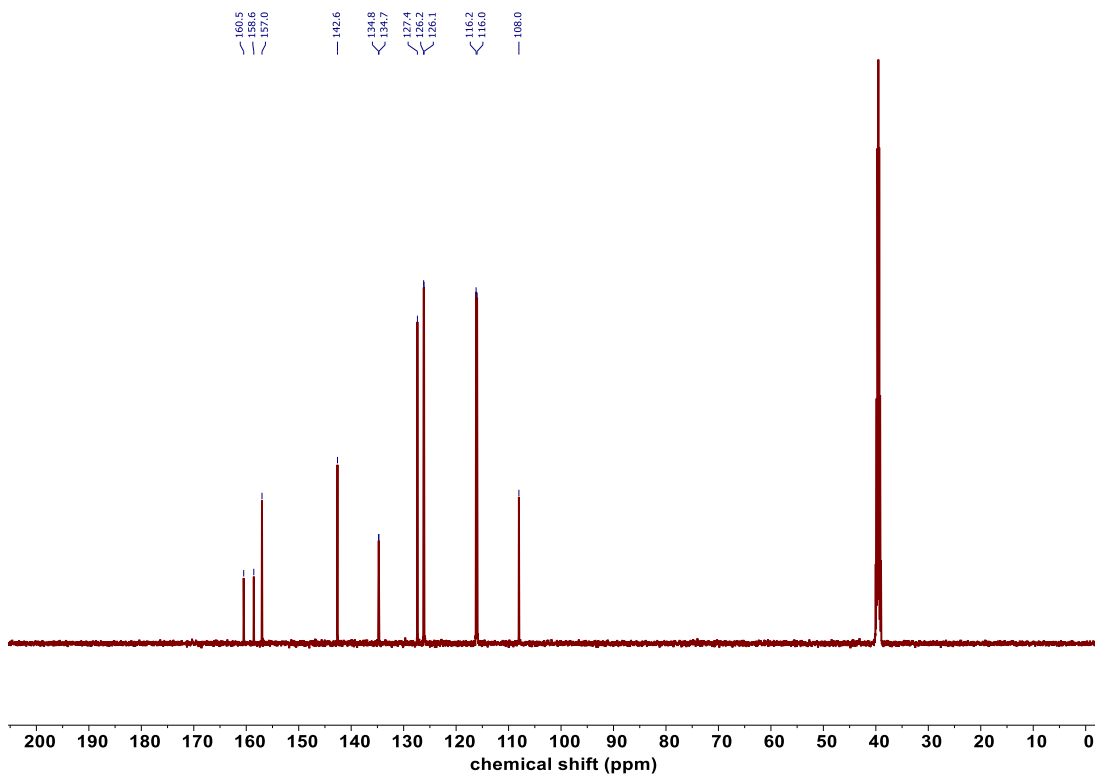

9, <sup>1</sup>H NMR (500 MHz, DMSO-d<sub>6</sub>)

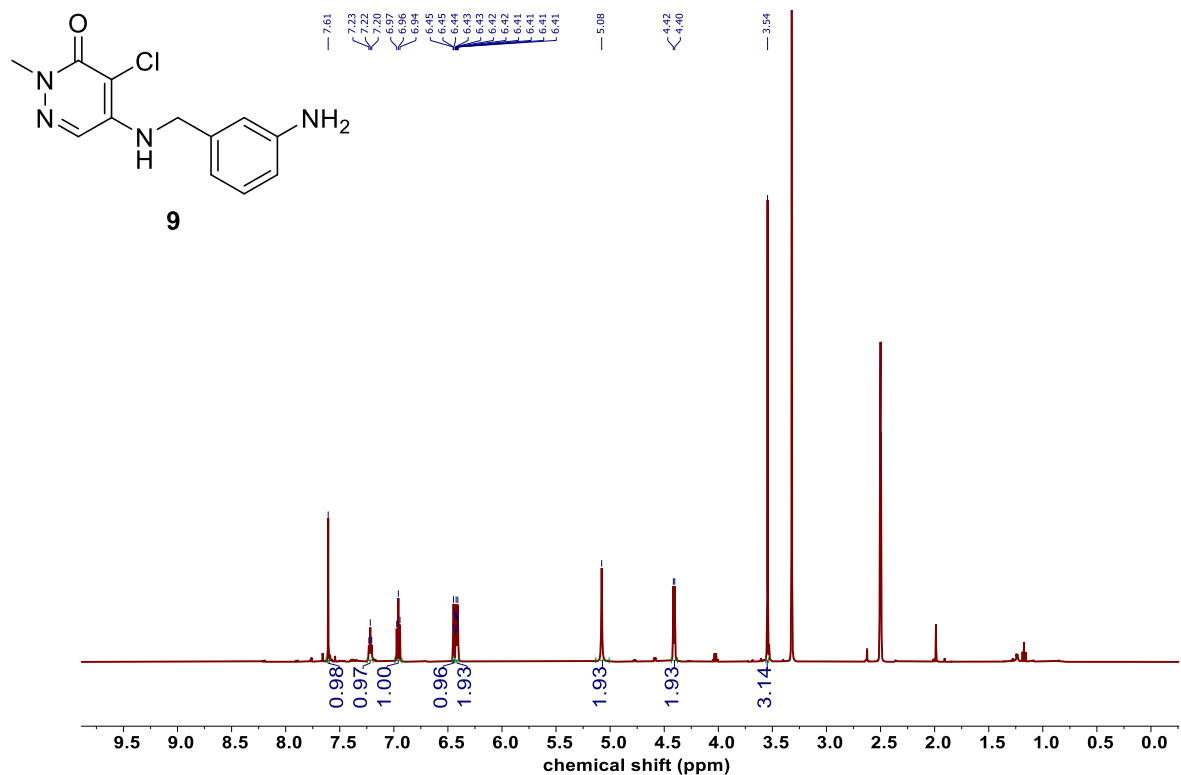

9, <sup>13</sup>C NMR (126 MHz, DMSO-d<sub>6</sub>)

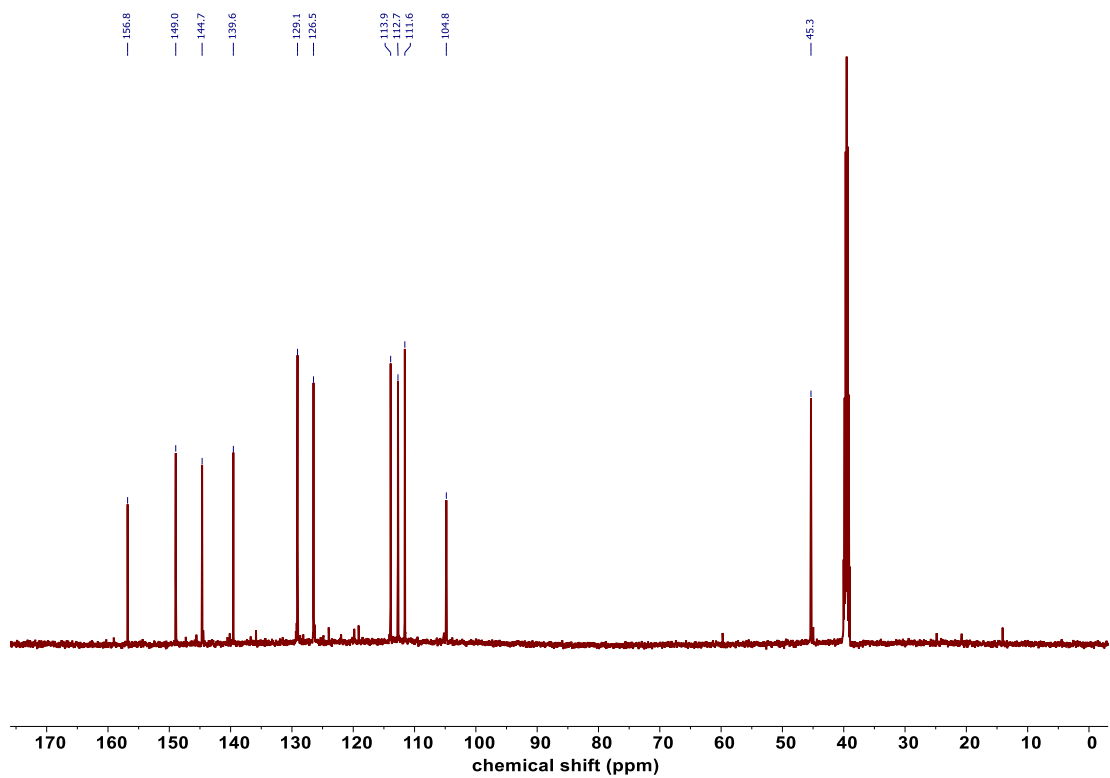

**10**,  $^1\text{H}$  NMR (500 MHz,  $\text{DMSO-}d_6$ )

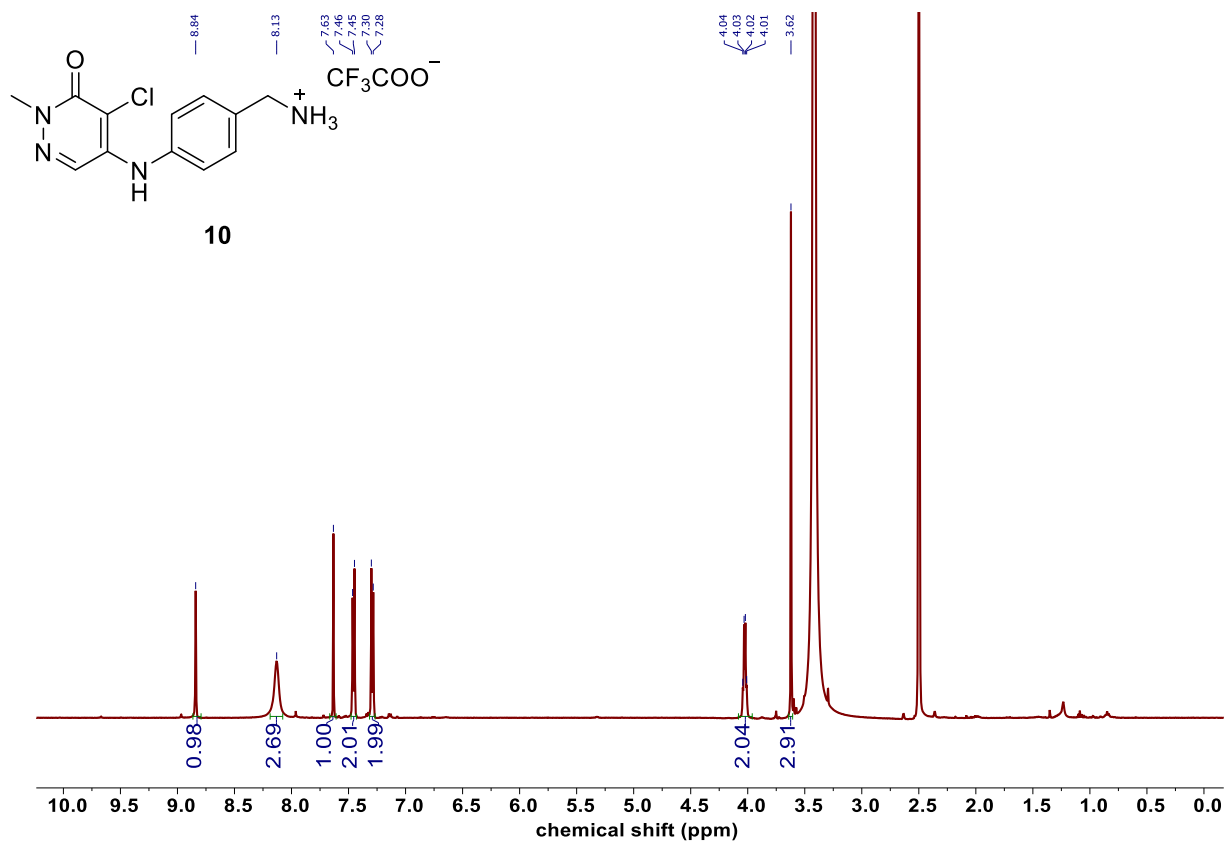

**10**,  $^{13}\text{C}$  NMR (126 MHz,  $\text{DMSO-}d_6$ )

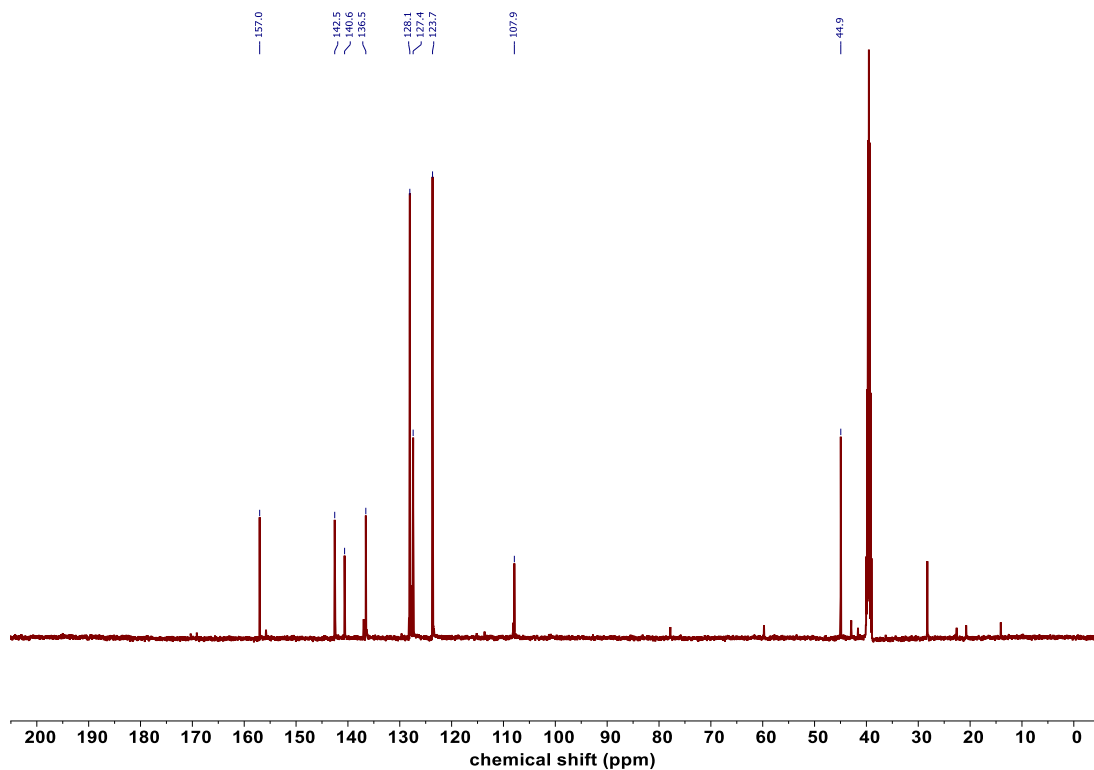



**11**,  $^1\text{H}$  NMR (500 MHz, Chloroform-*d*)

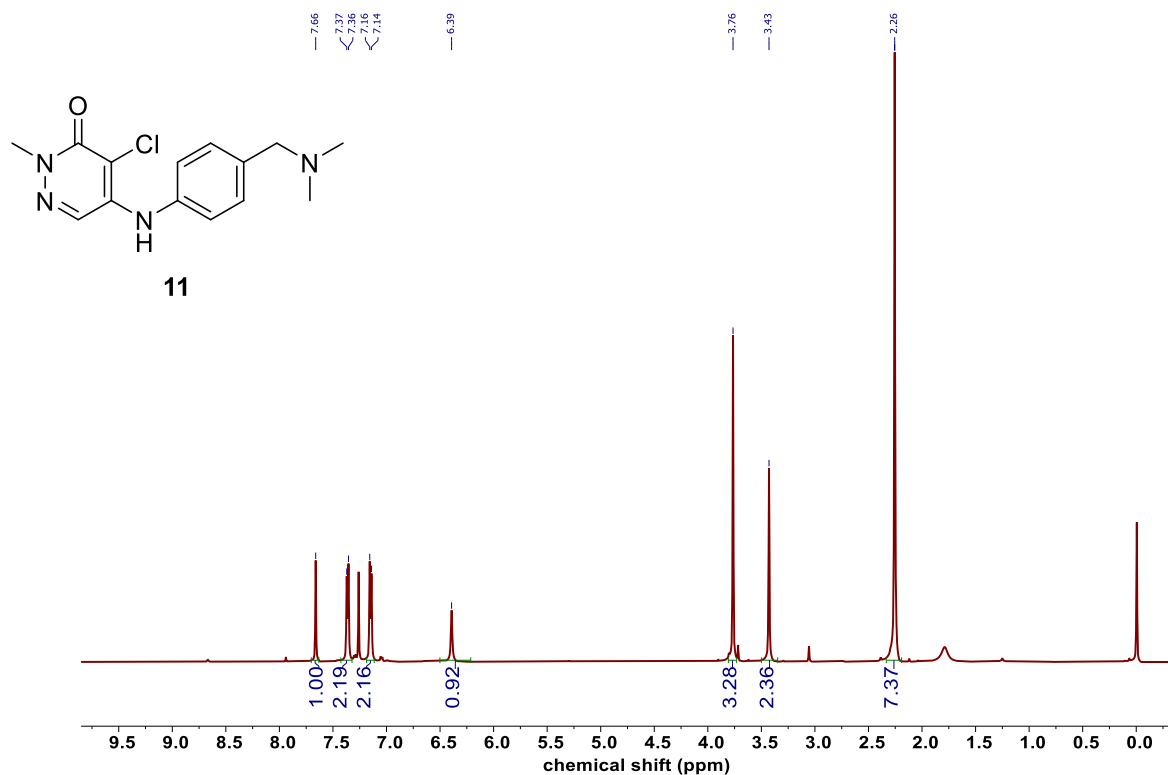

**11**,  $^{13}\text{C}$  NMR (126 MHz, DMSO-*d*<sub>6</sub>)

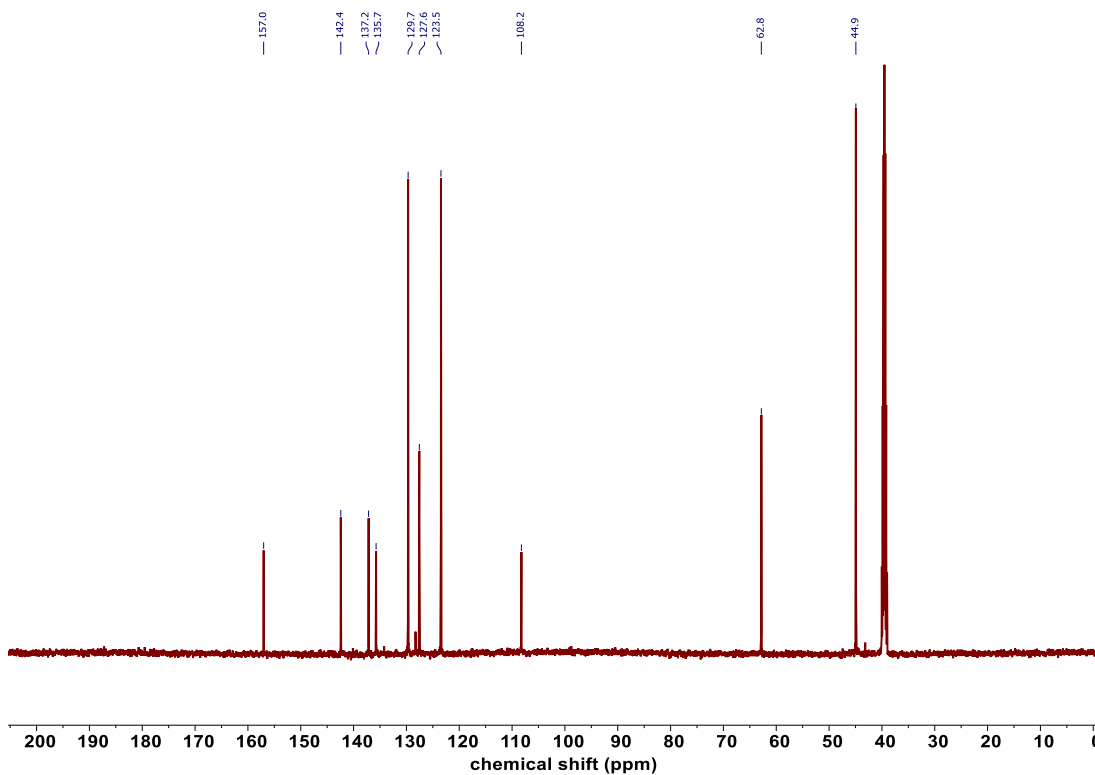

**12**,  $^1\text{H}$  NMR (500 MHz,  $\text{DMSO-}d_6$ )

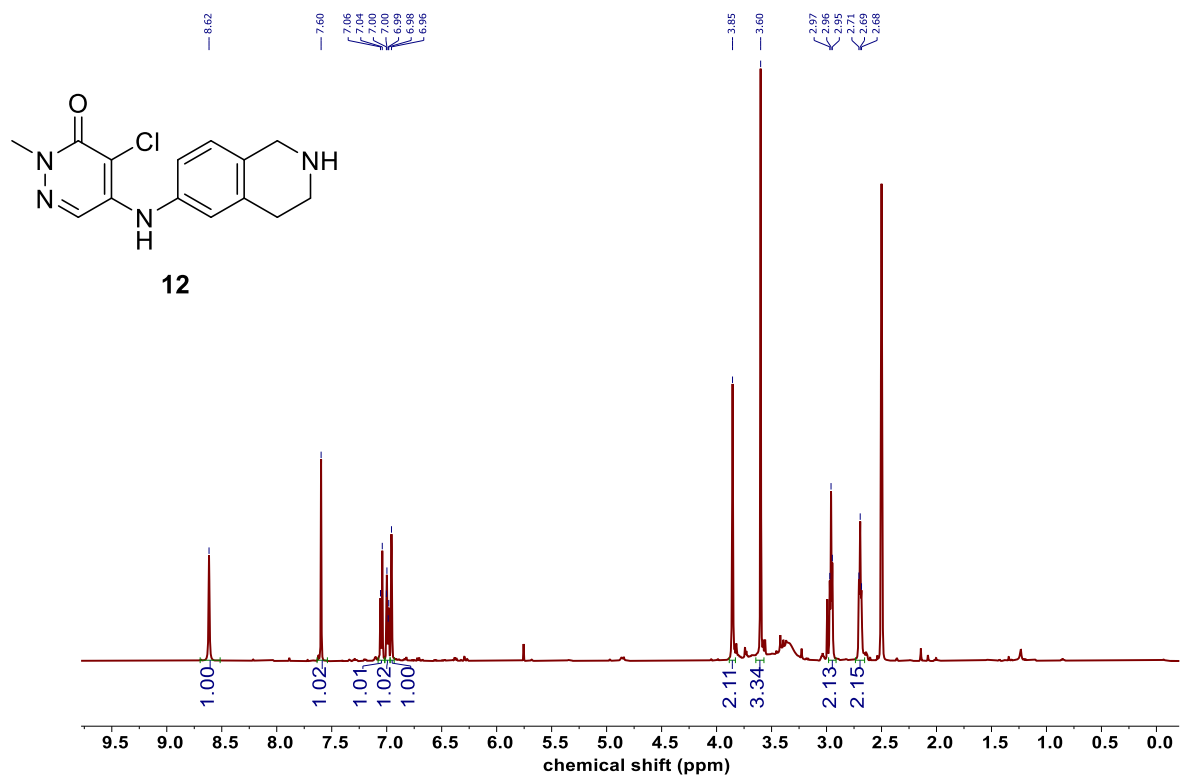

**12**,  $^{13}\text{C}$  NMR (126 MHz,  $\text{DMSO-}d_6$ )

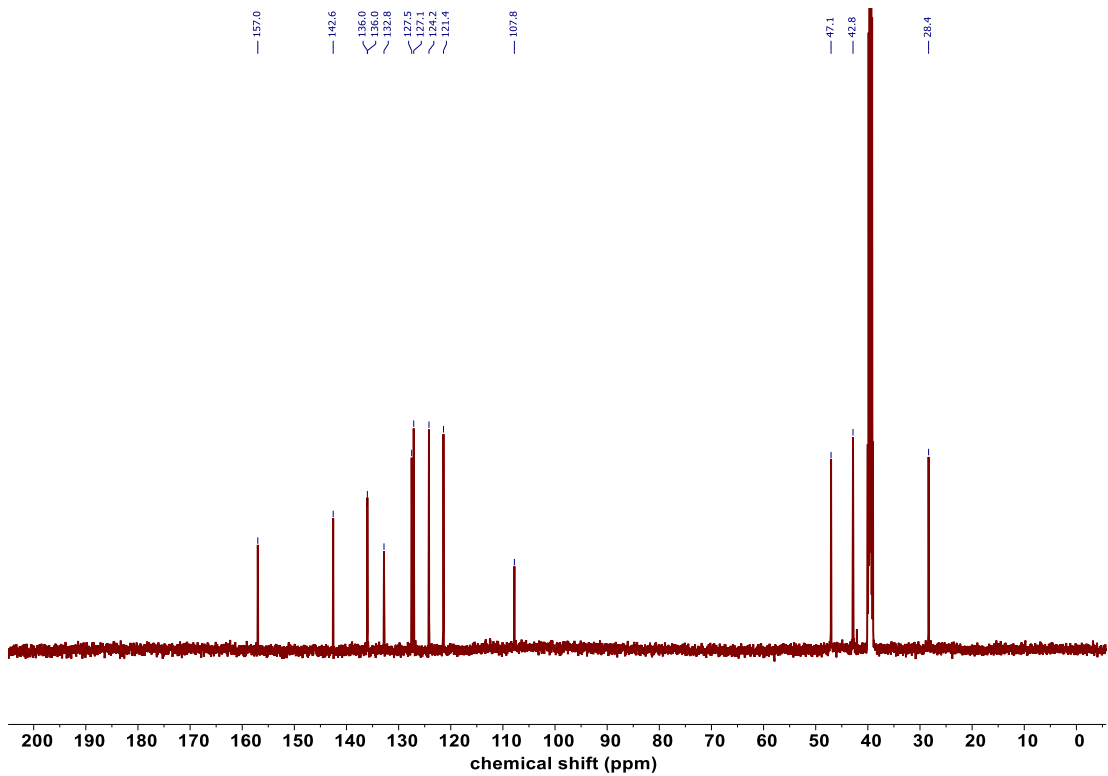

**13**,  $^1\text{H}$  NMR (500 MHz,  $\text{DMSO}-d_6$ )

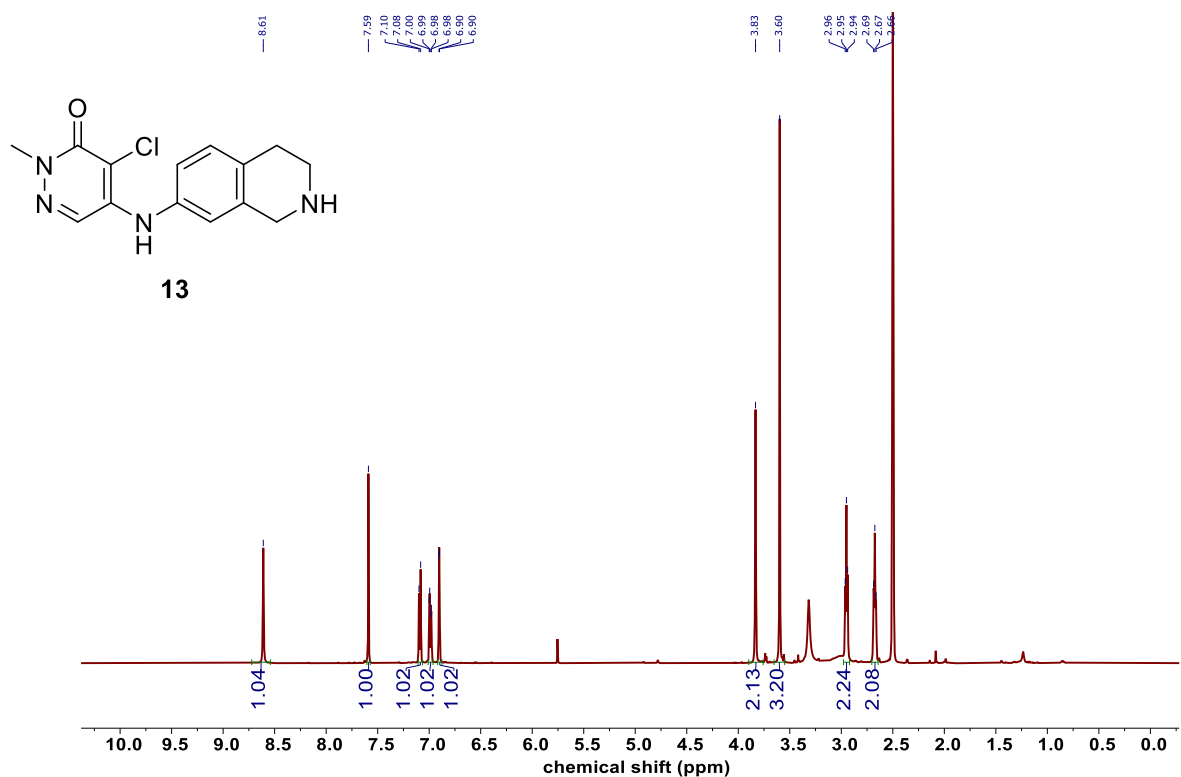

**13**,  $^{13}\text{C}$  NMR (126 MHz,  $\text{DMSO}-d_6$ )

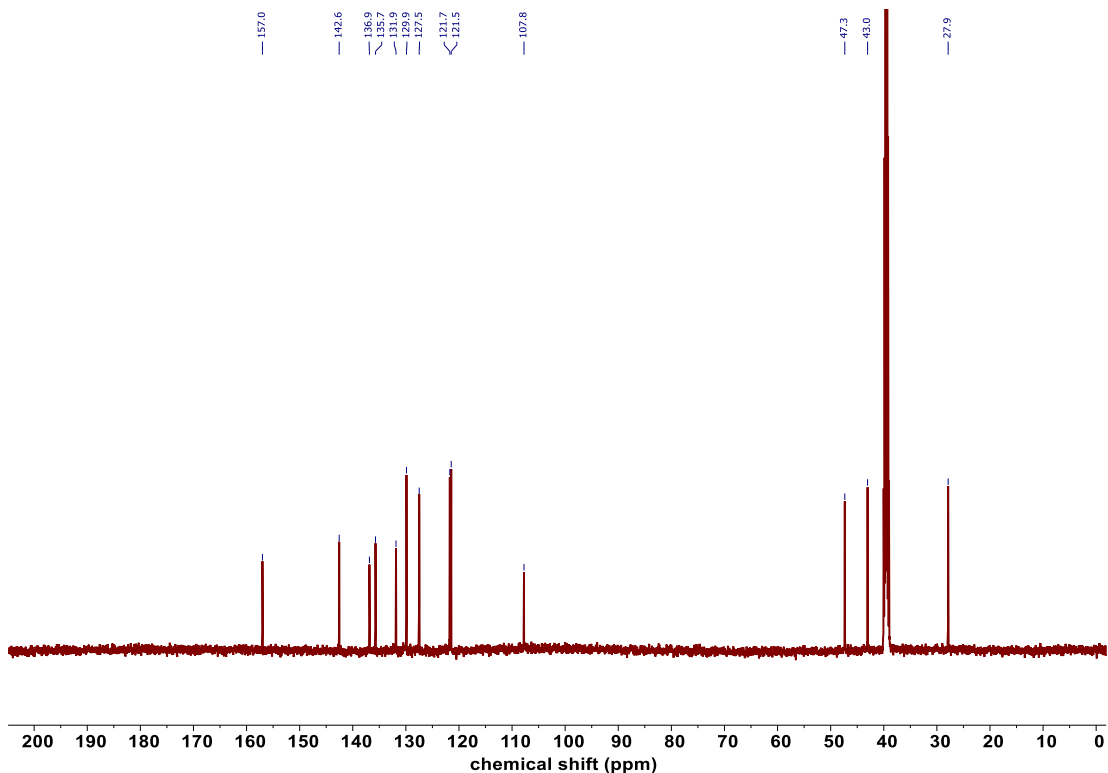

**14**,  $^1\text{H}$  NMR (500 MHz,  $\text{DMSO-}d_6$ )

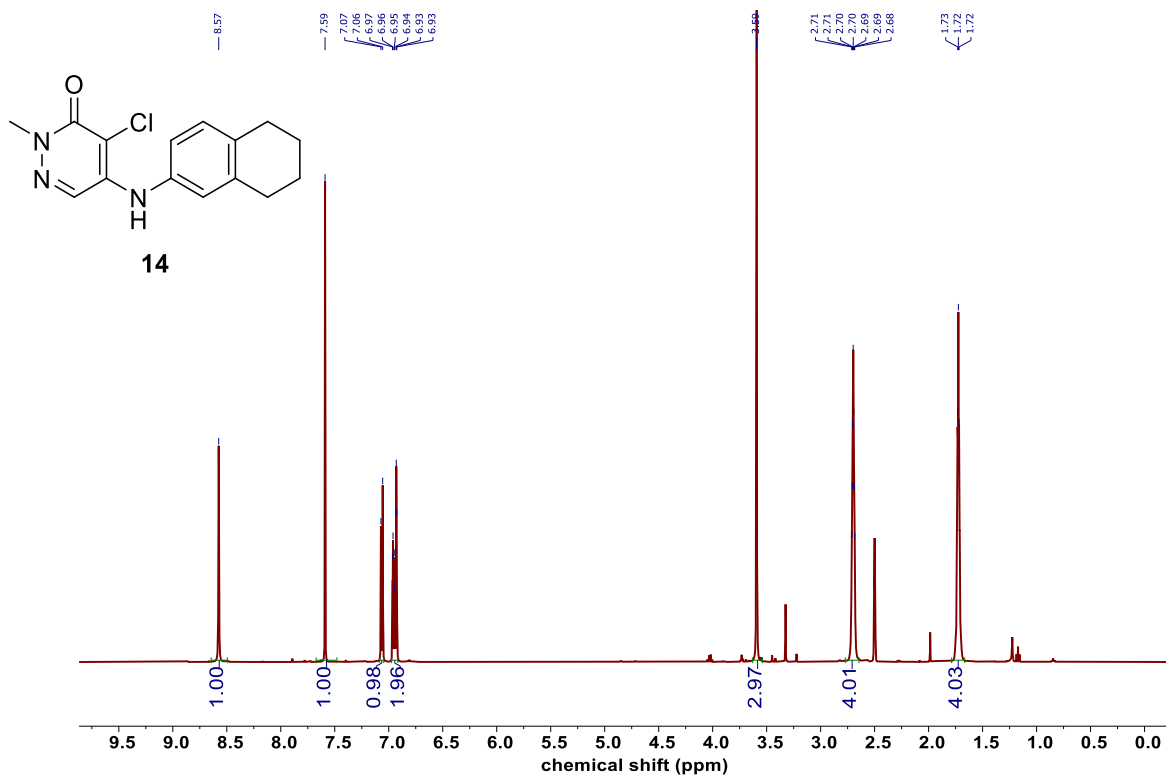

**14**,  $^{13}\text{C}$  NMR (126 MHz,  $\text{DMSO-}d_6$ )

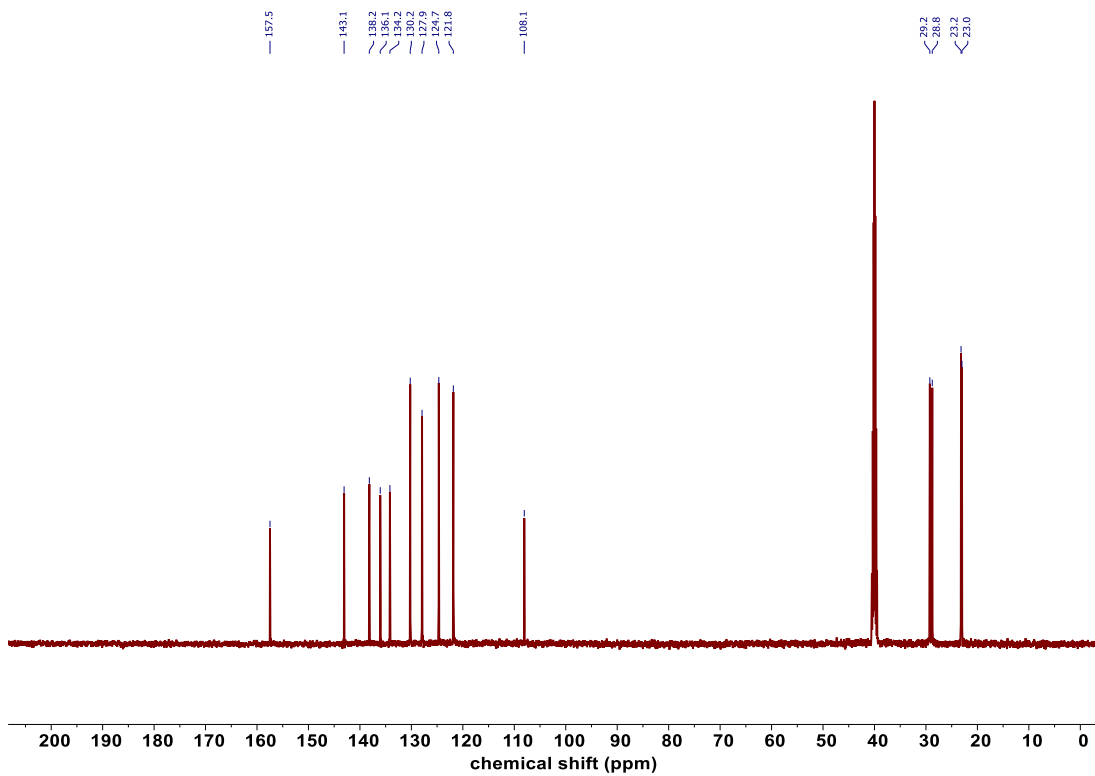

15, <sup>1</sup>H NMR (500 MHz, DMSO-*d*<sub>6</sub>)

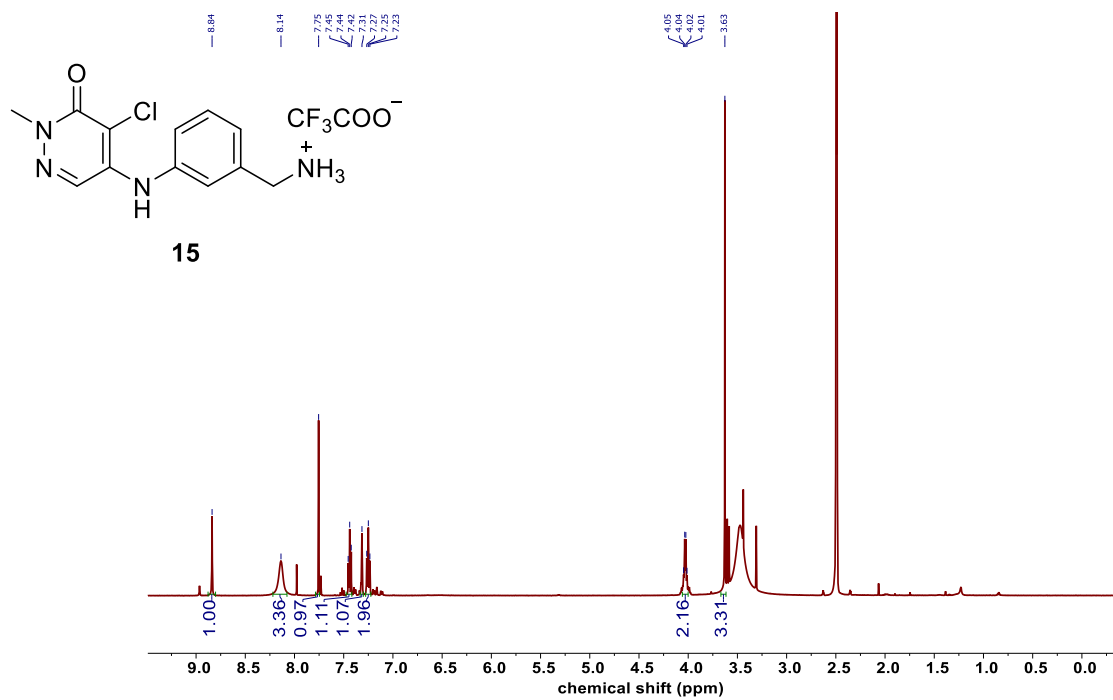

15, <sup>13</sup>C NMR (126 MHz, DMSO-*d*<sub>6</sub>)

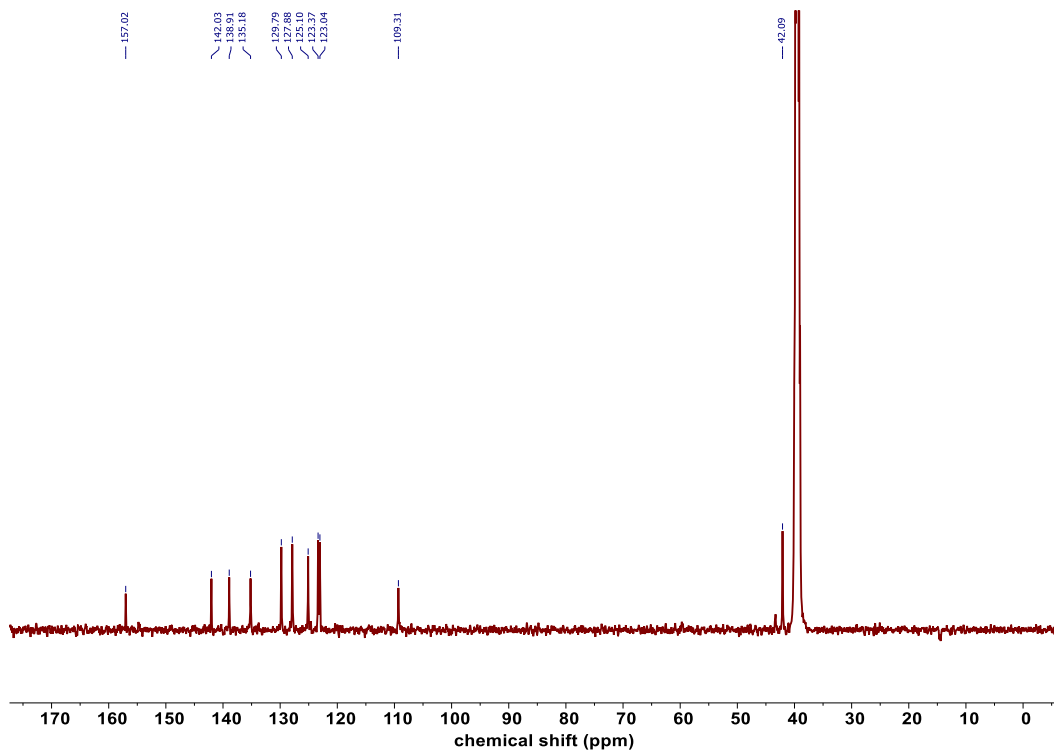

16, <sup>1</sup>H NMR (500 MHz, DMSO-d<sub>6</sub>)

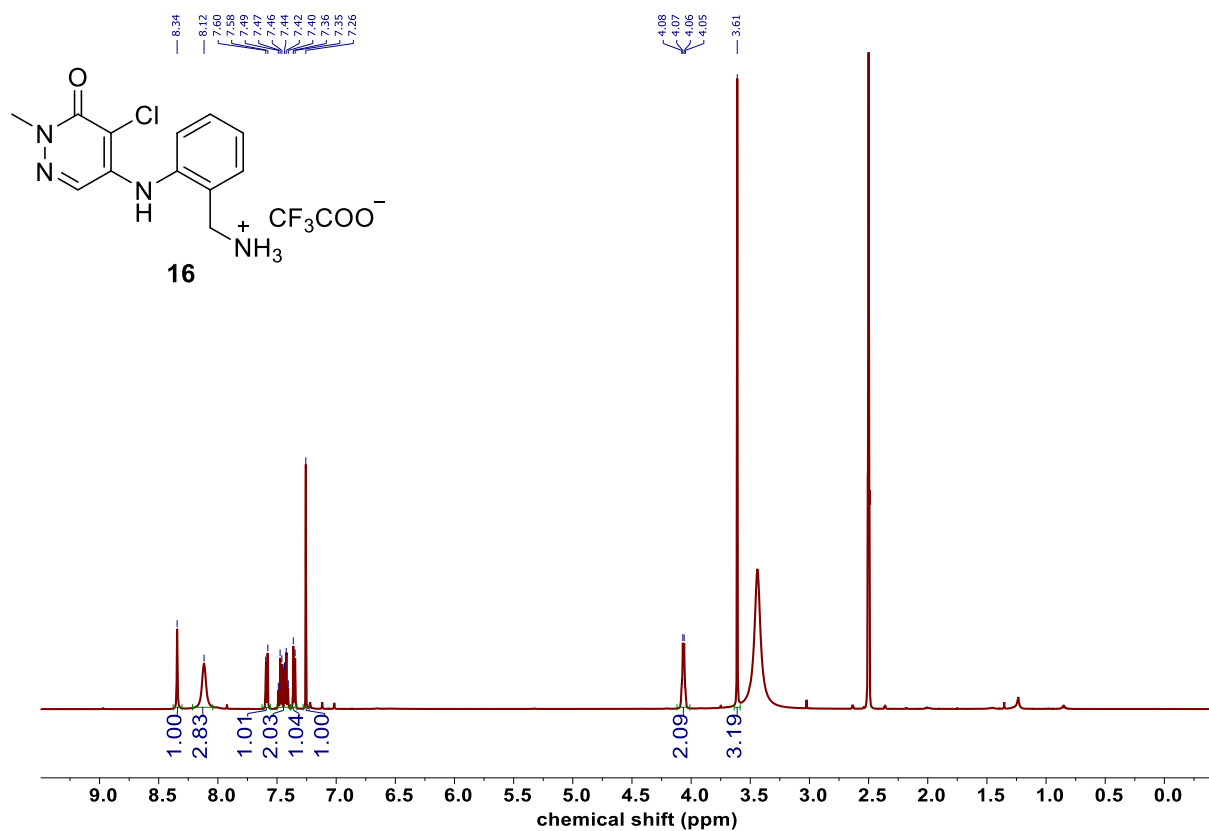

17, <sup>1</sup>H NMR (500 MHz, Chloroform-*d*)

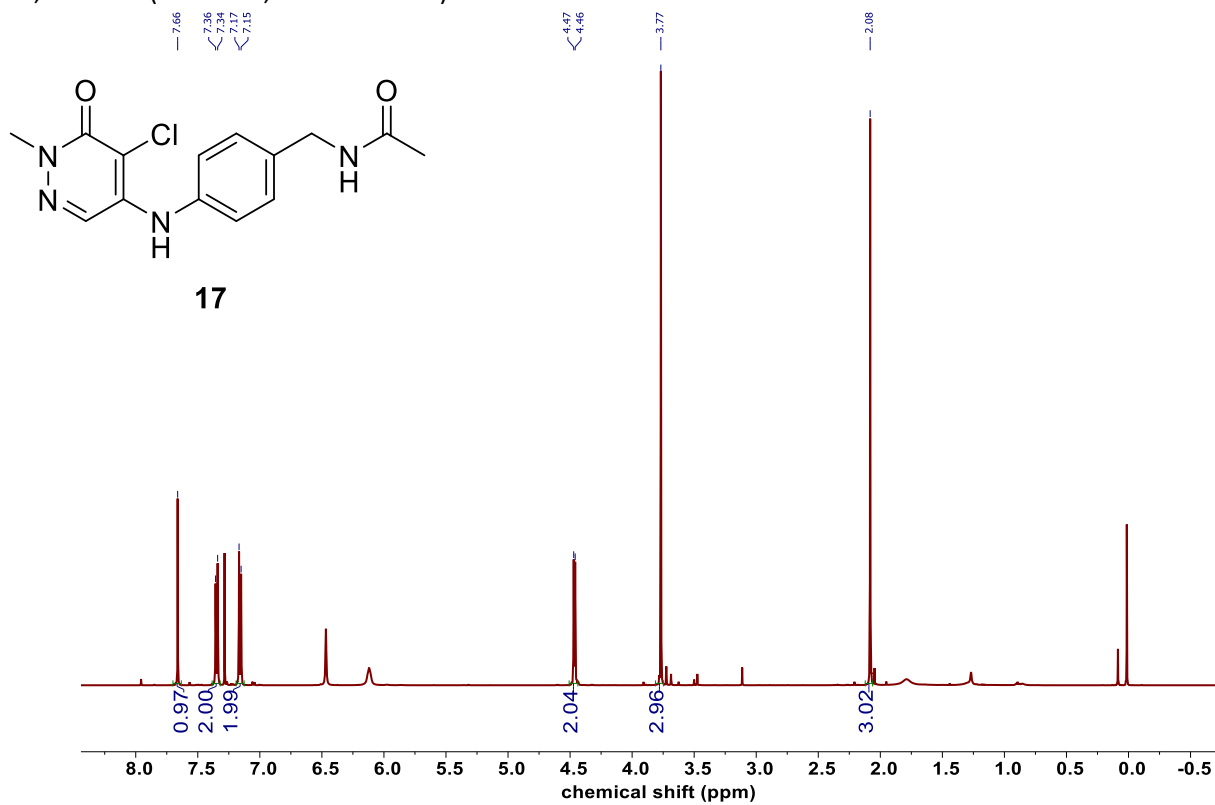

17, <sup>13</sup>C NMR (126 MHz, Chloroform-*d*)

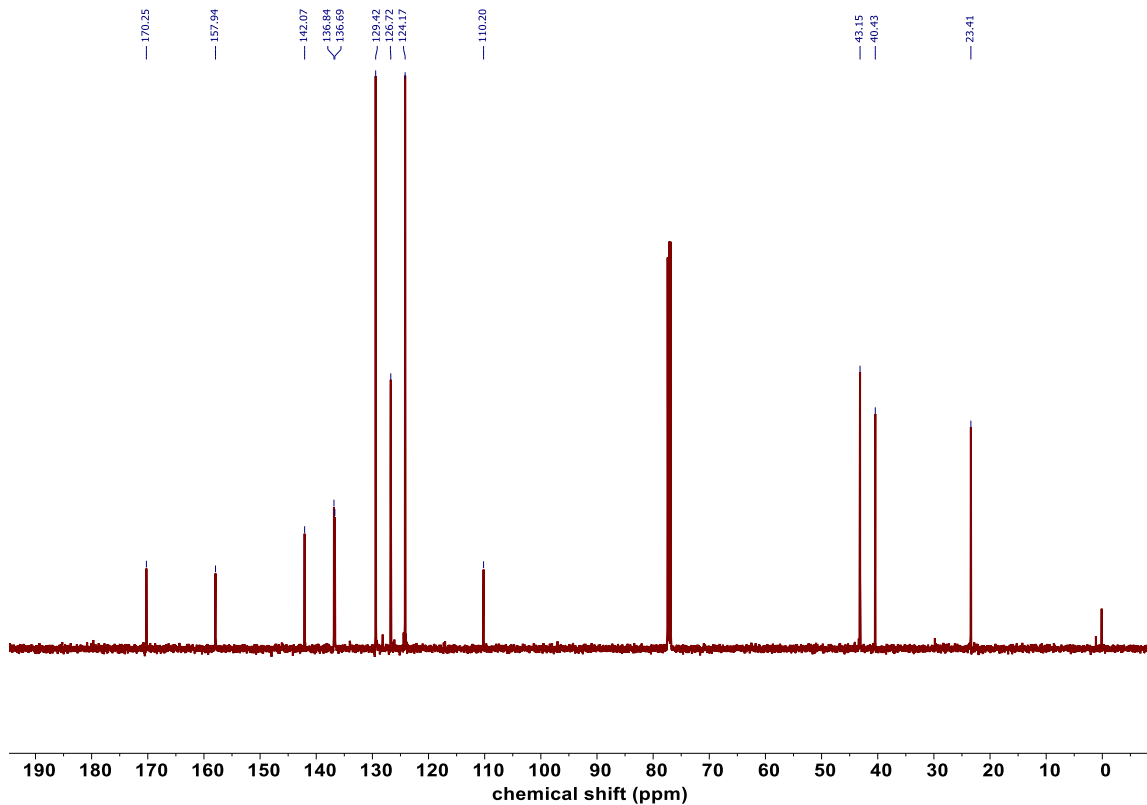

**18**,  $^1\text{H}$  NMR (500 MHz,  $\text{DMSO-}d_6$ )

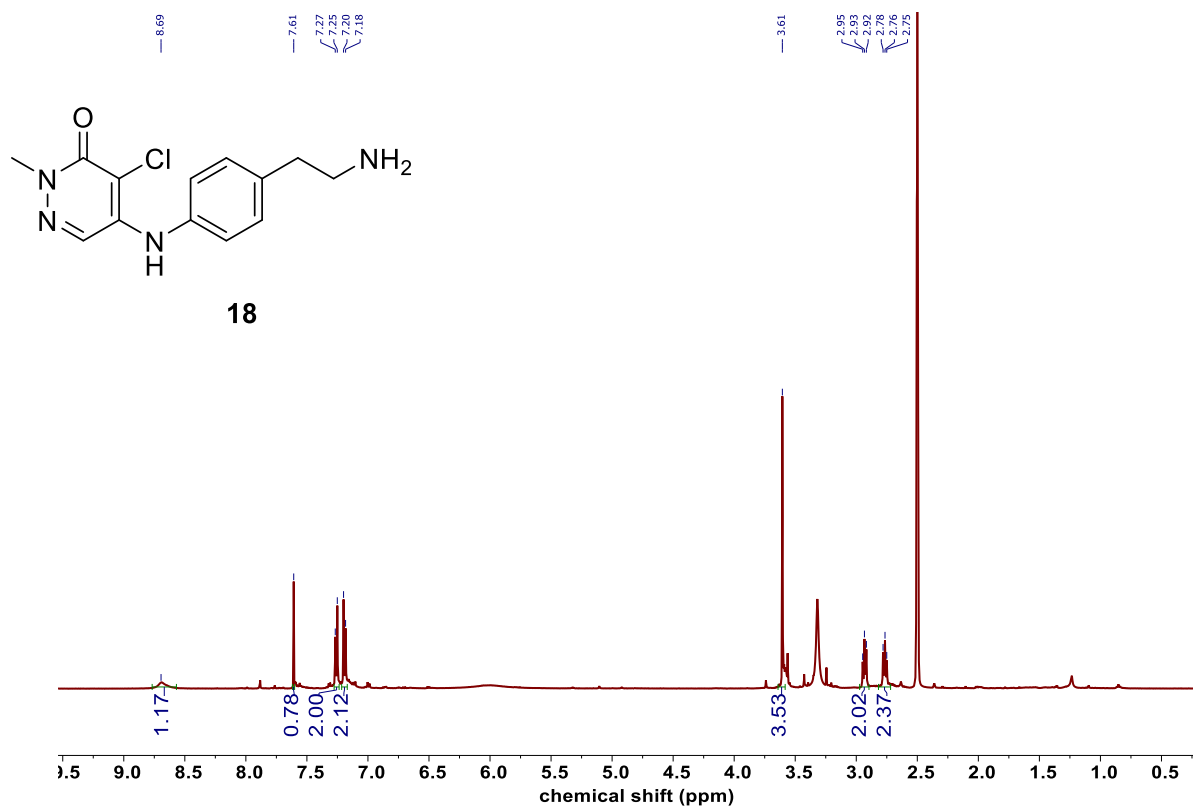

**18**,  $^{13}\text{C}$  NMR (126 MHz,  $\text{DMSO-}d_6$ )

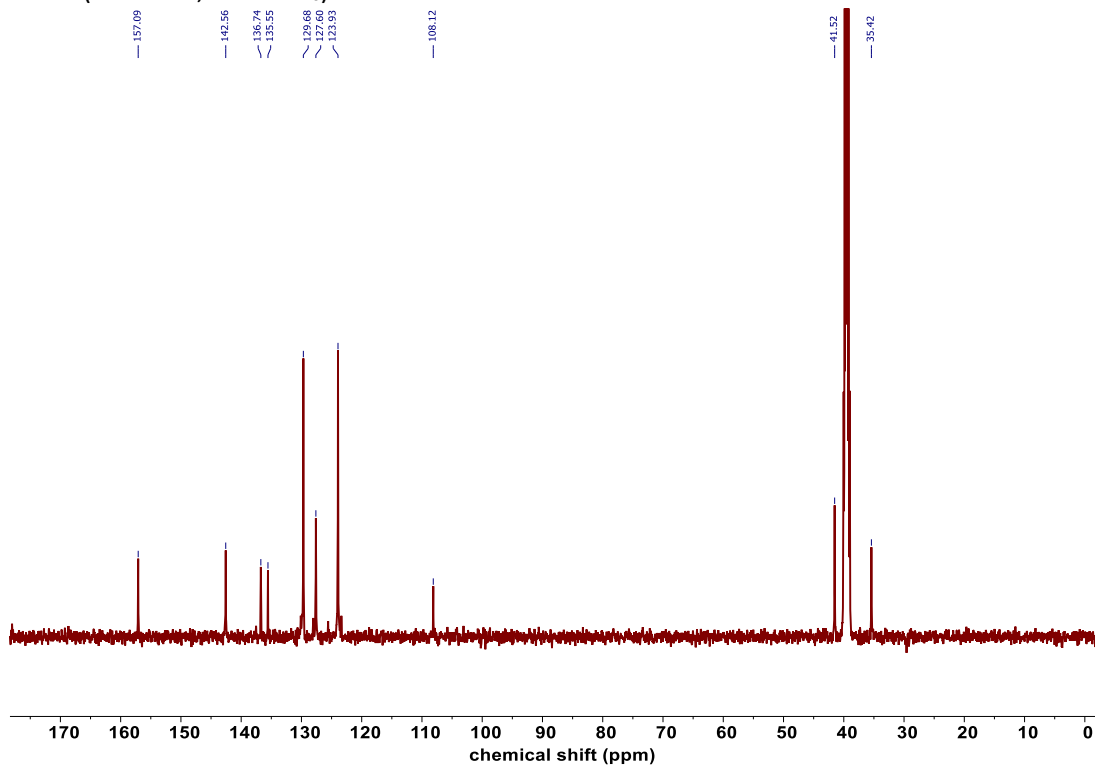



**19**,  $^1\text{H}$  NMR (500 MHz,  $\text{DMSO-}d_6$ )

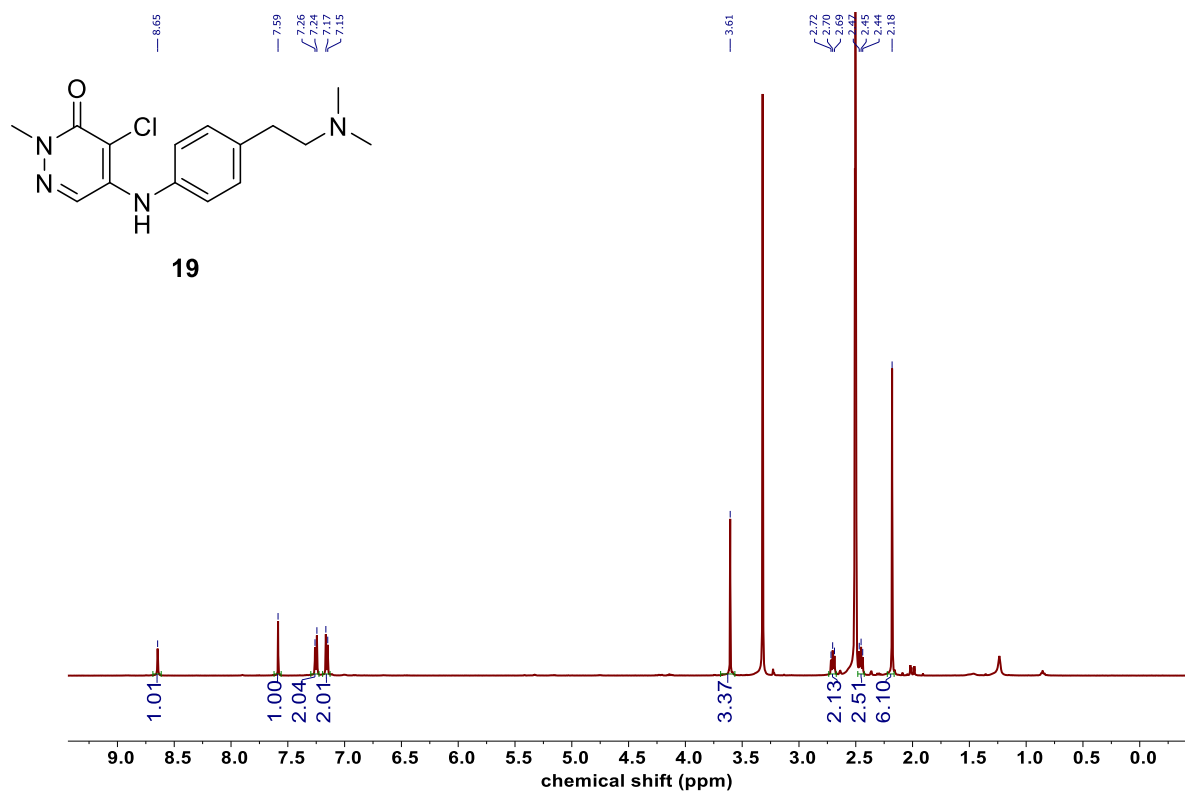

**19**,  $^{13}\text{C}$  NMR (126 MHz,  $\text{Chloroform-}d$ )

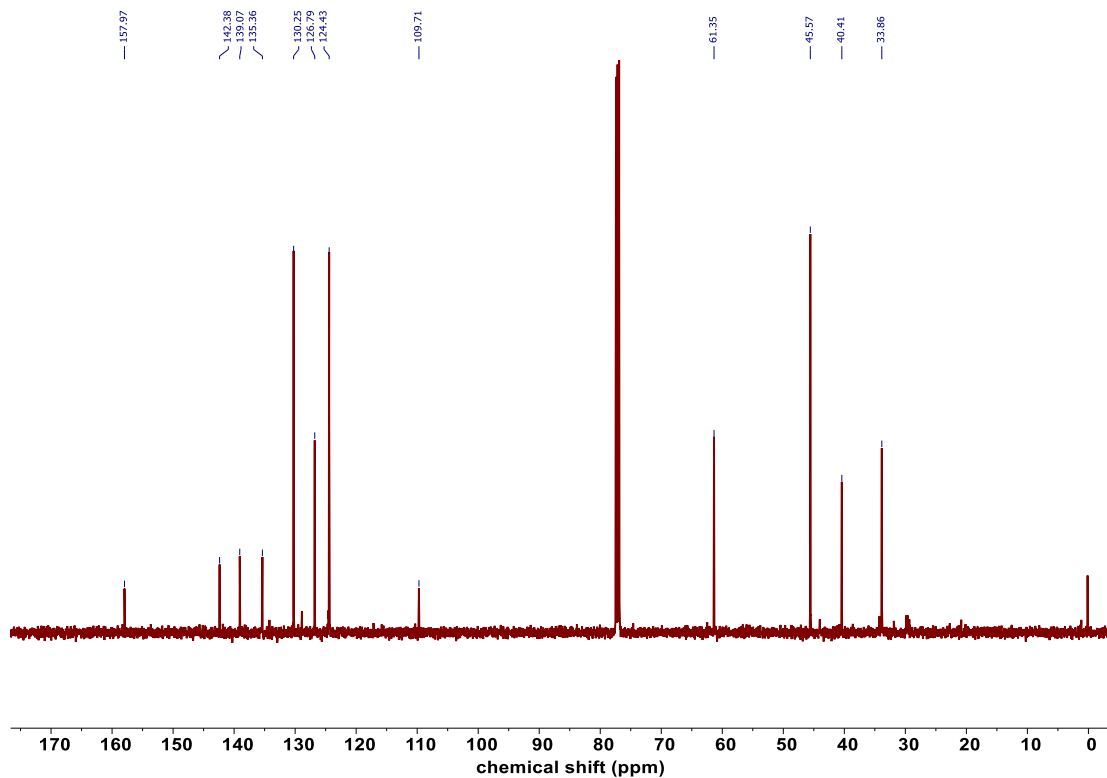

**20**,  $^1\text{H}$  NMR (500 MHz,  $\text{DMSO-}d_6$ )

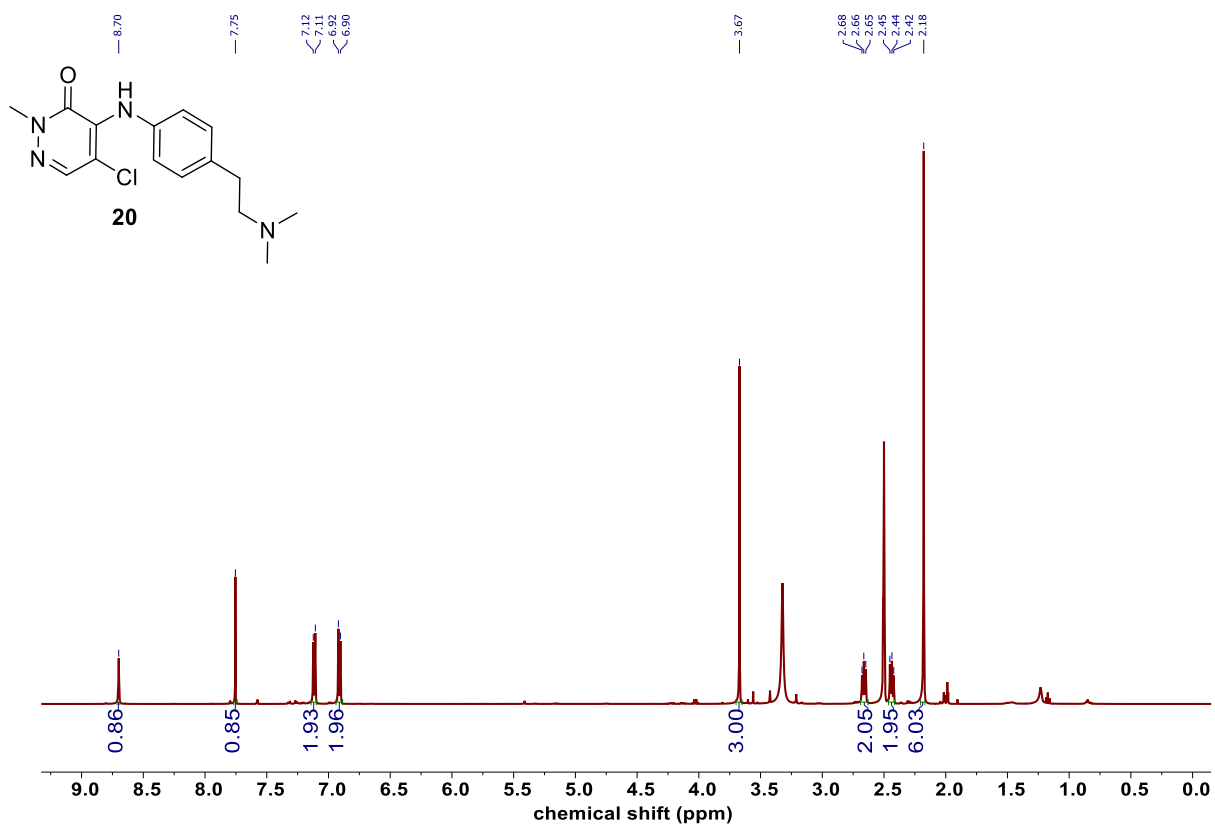

**20**,  $^{13}\text{C}$  NMR (126 MHz,  $\text{Chloroform-}d$ )

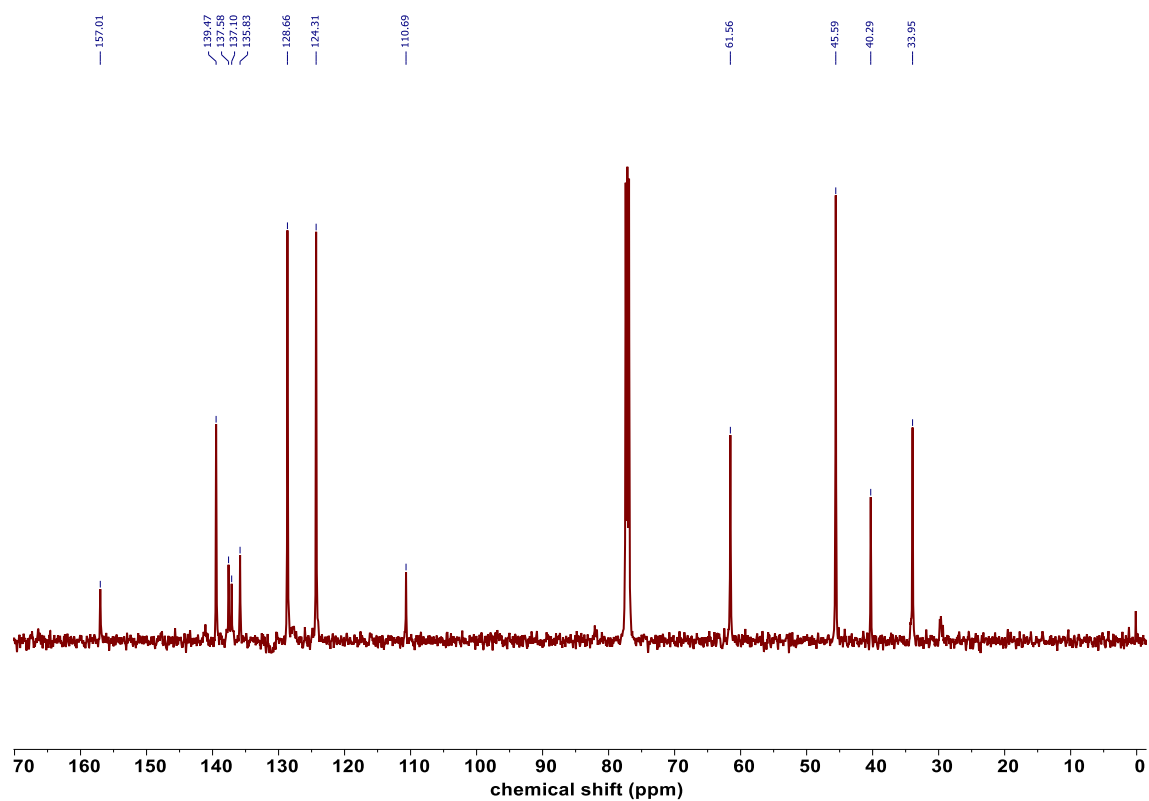

**21**,  $^1\text{H}$  NMR (500 MHz,  $\text{DMSO-}d_6$ )

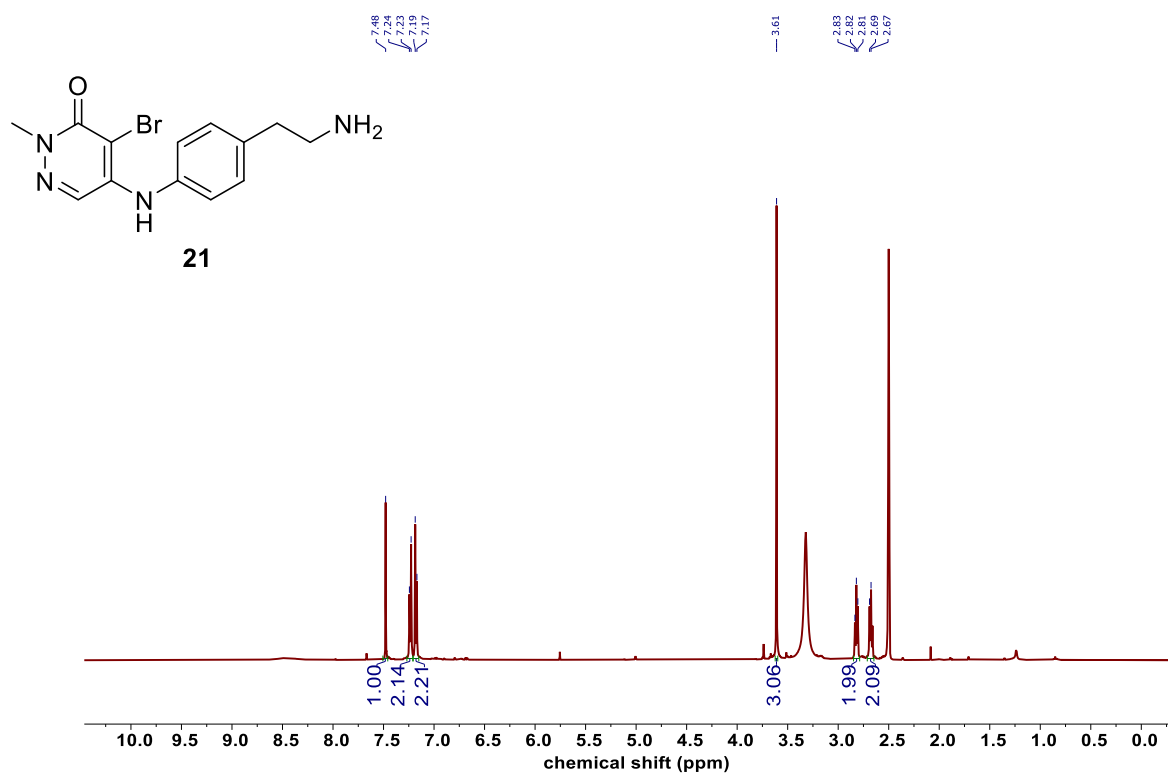

**21**,  $^{13}\text{C}$  NMR (126 MHz,  $\text{DMSO-}d_6$ )

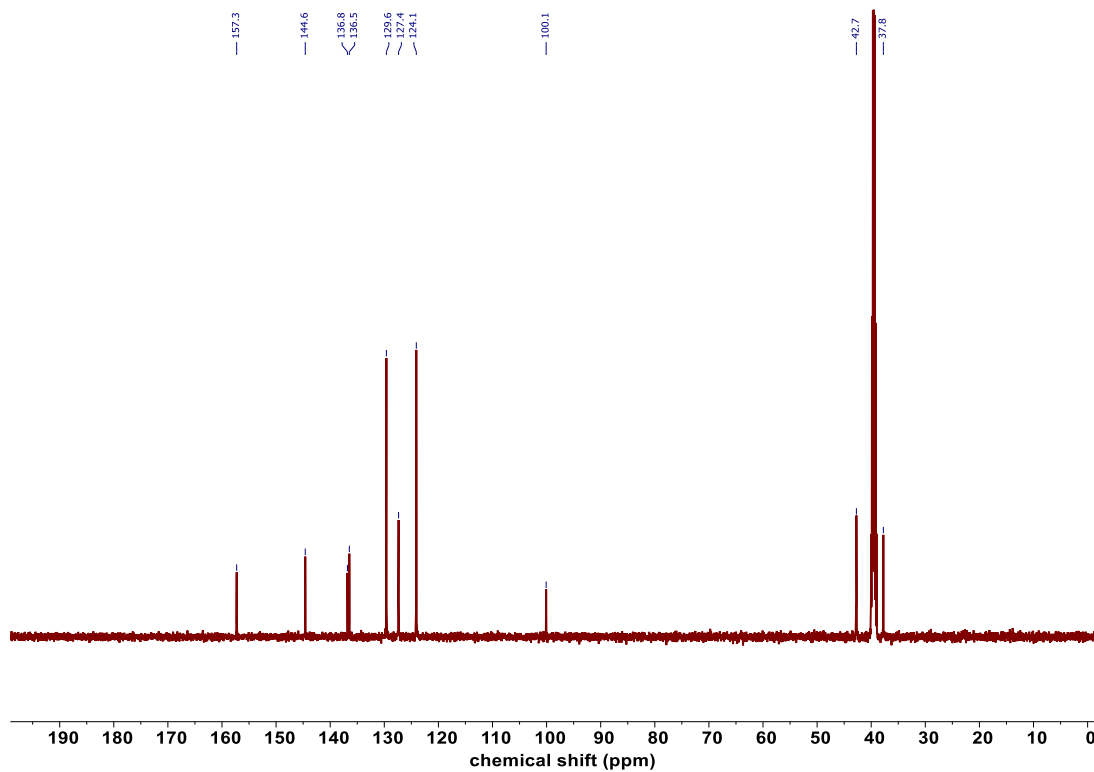

**22**,  $^1\text{H}$  NMR (500 MHz,  $\text{DMSO-}d_6$ )

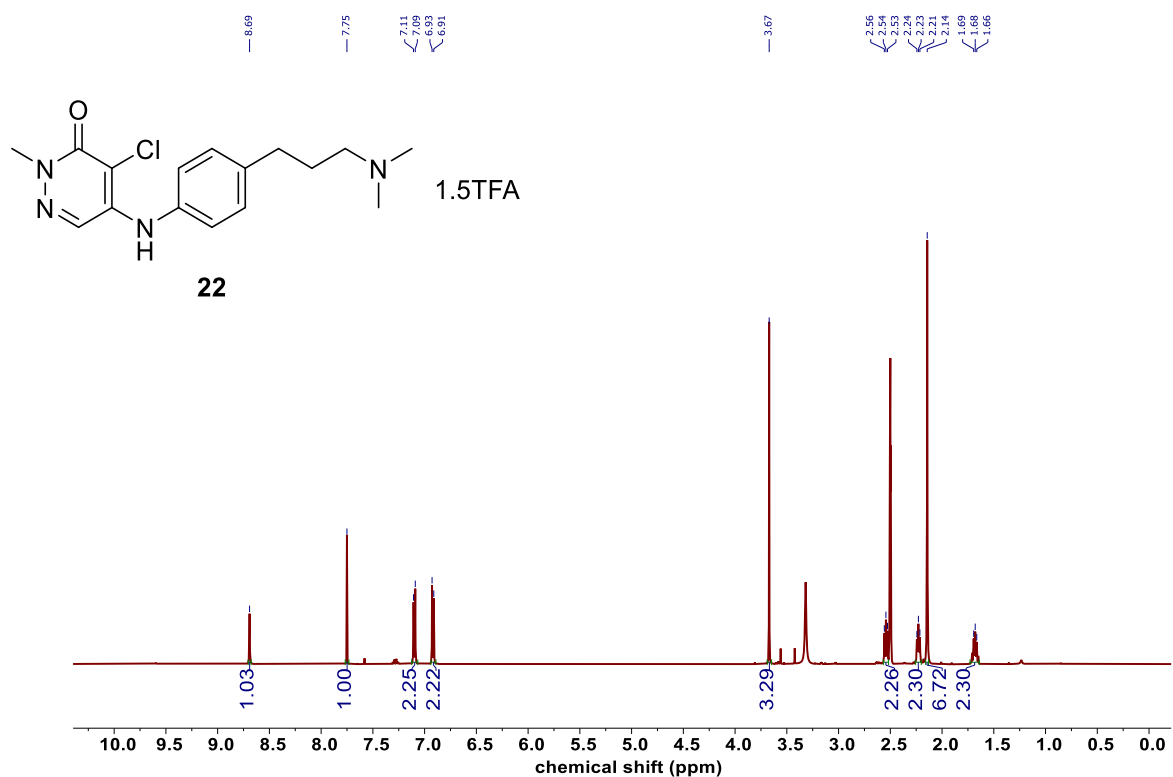

**22**,  $^{13}\text{C}$  NMR (126 MHz,  $\text{DMSO-}d_6$ )

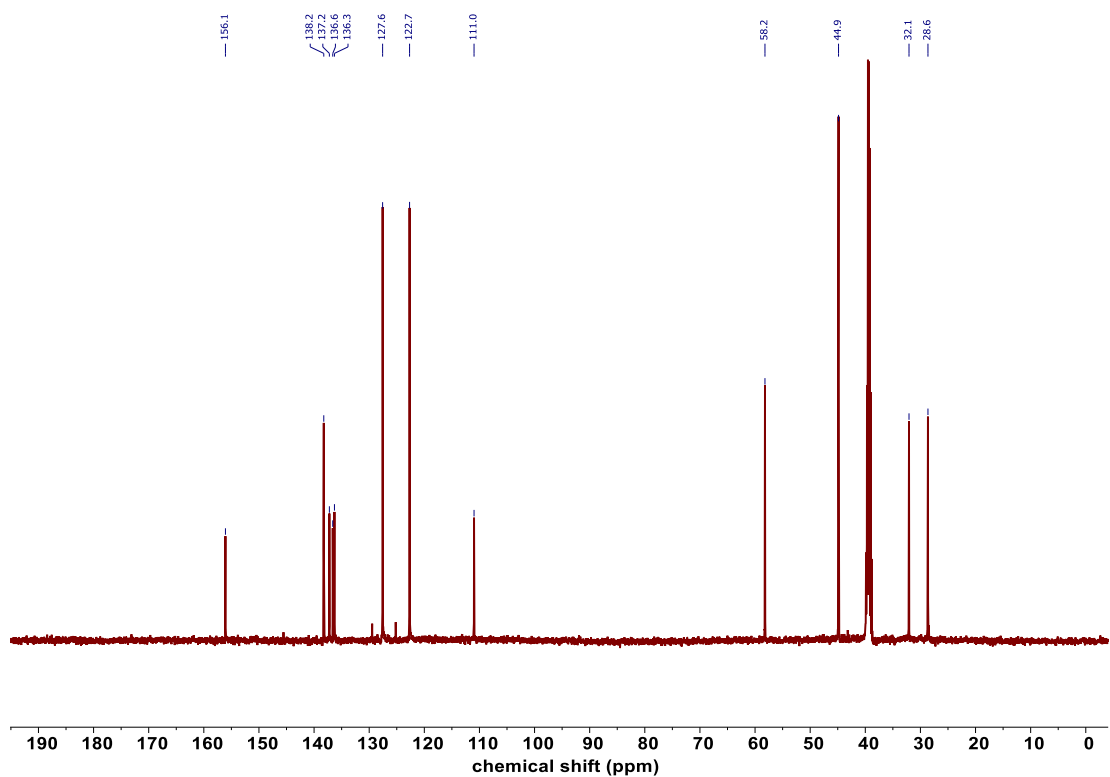

**23**,  $^1\text{H}$  NMR (500 MHz,  $\text{DMSO-}d_6$ )

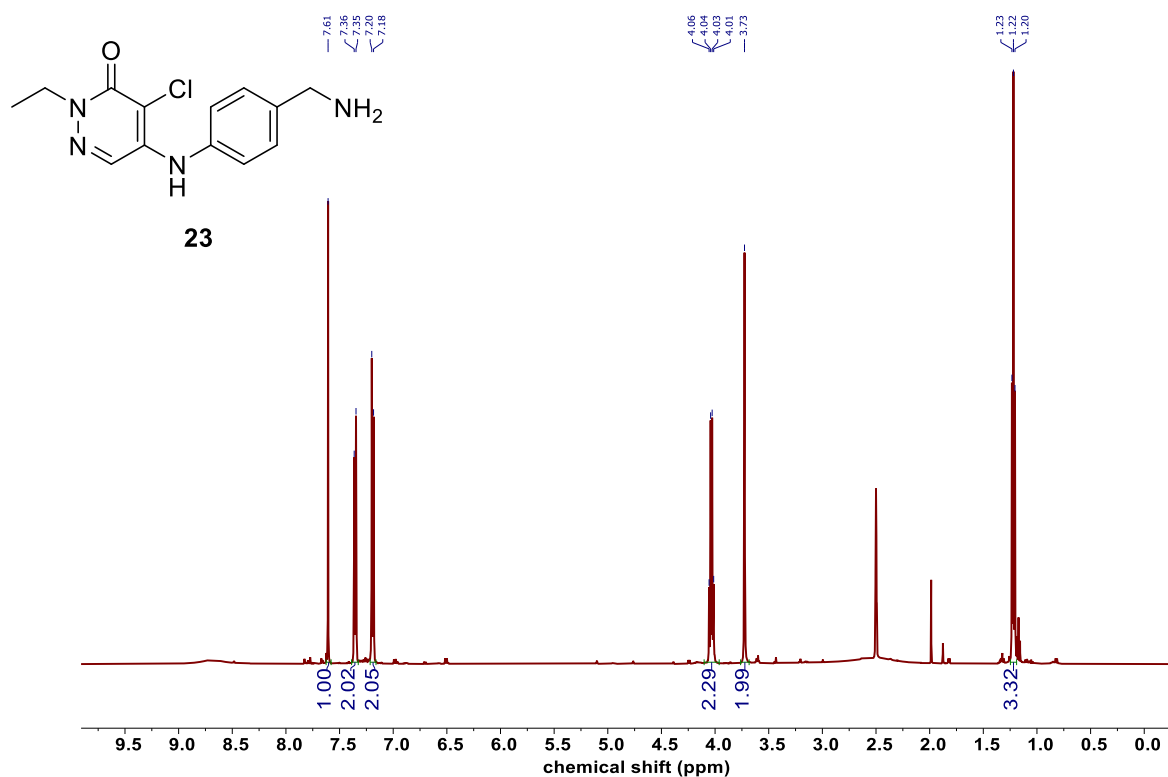

**23**,  $^{13}\text{C}$  NMR (126 MHz,  $\text{DMSO-}d_6$ )

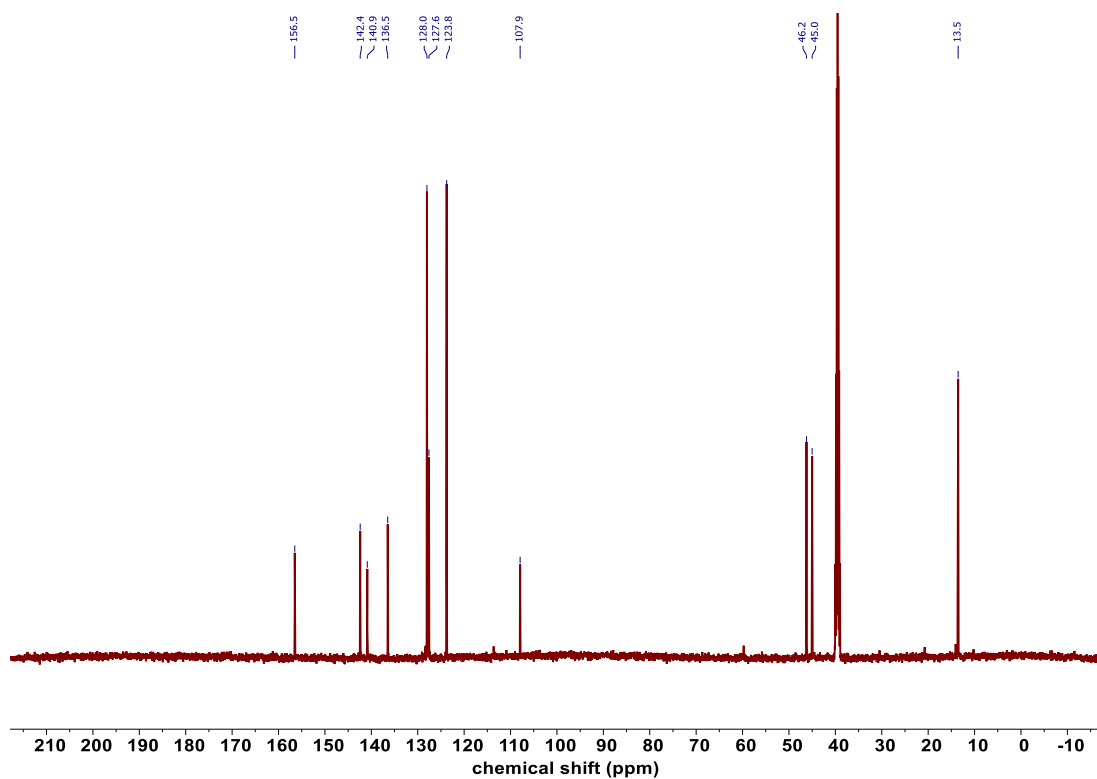

**24**,  $^1\text{H}$  NMR (500 MHz,  $\text{DMSO-}d_6$ )

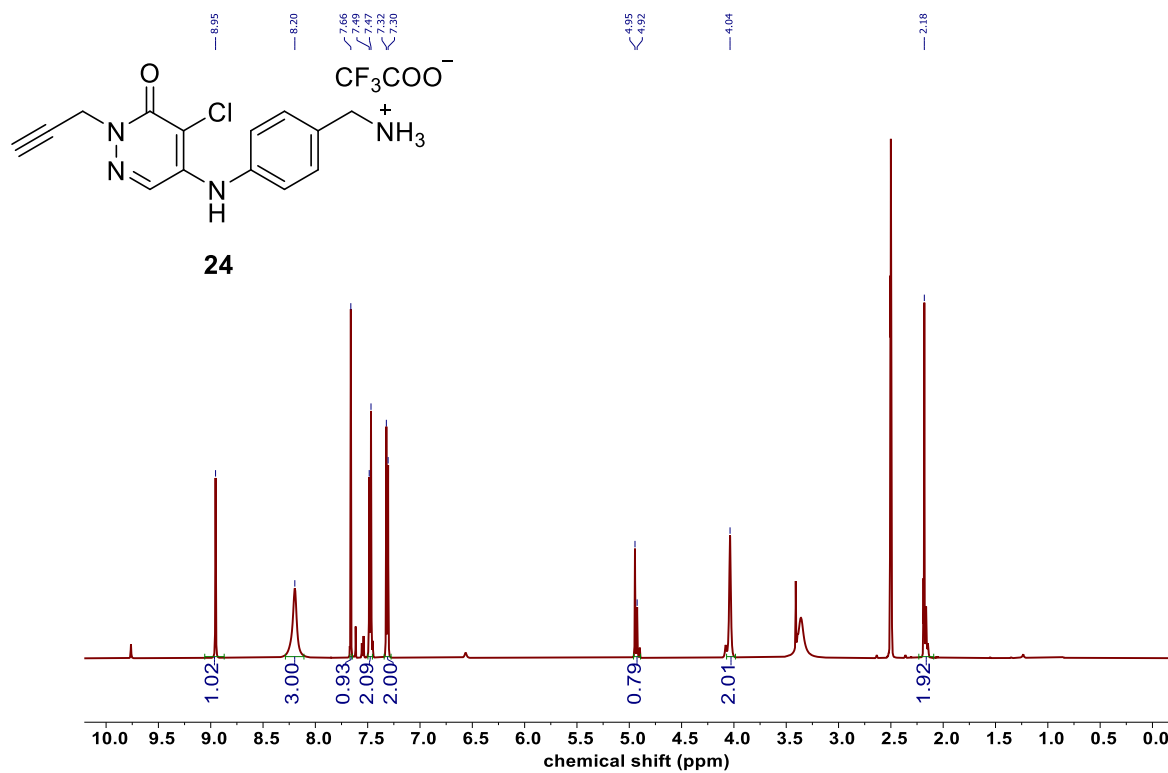

**24**,  $^{13}\text{C}$  NMR (126 MHz,  $\text{DMSO-}d_6$ )

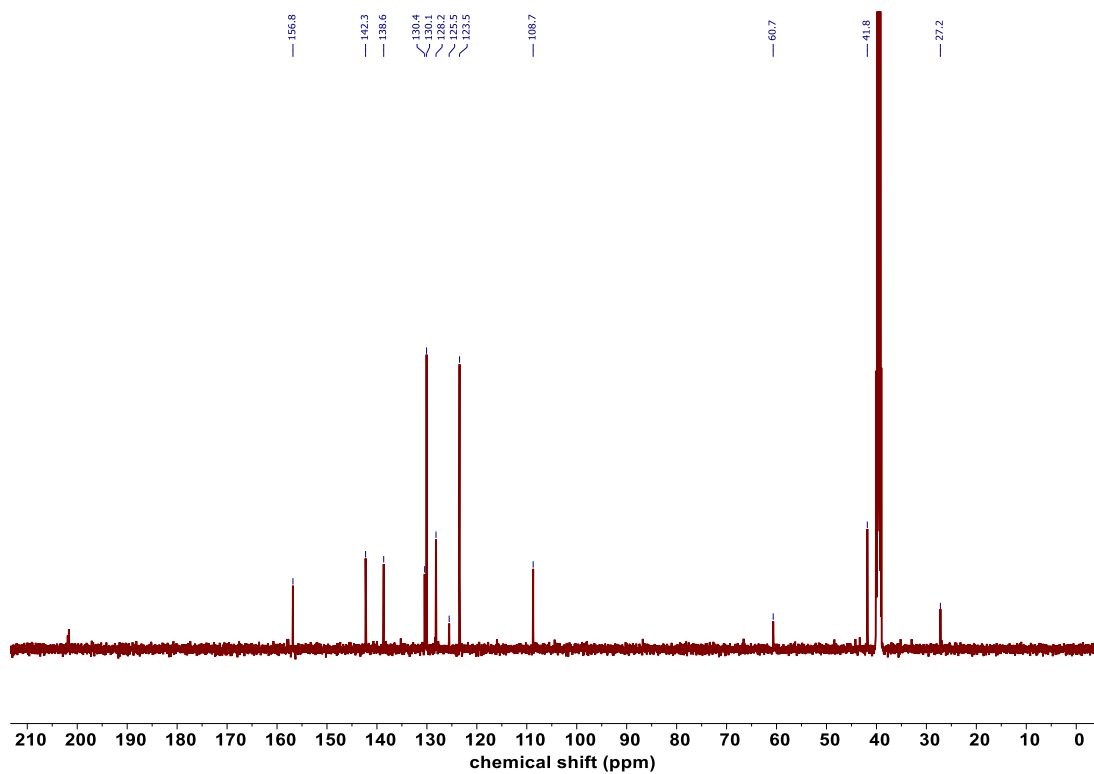

25,  $^1\text{H}$  NMR (500 MHz,  $\text{DMSO}-d_6$ )

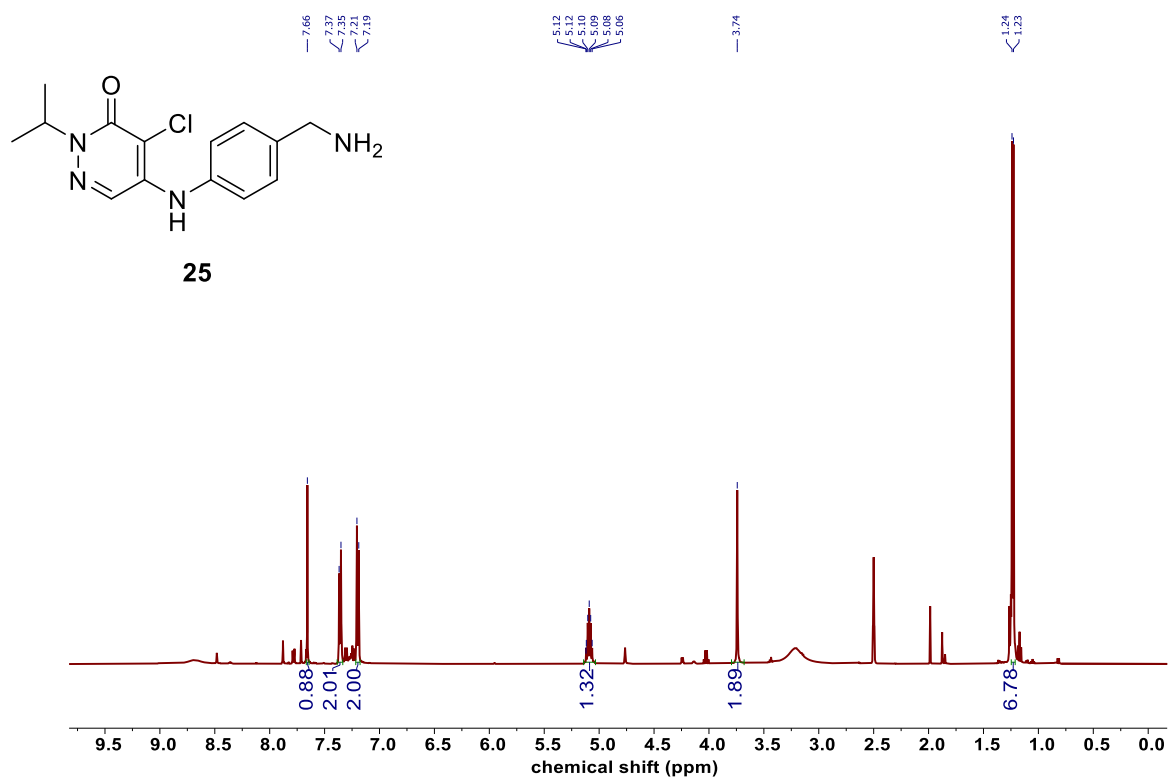

25,  $^{13}\text{C}$  NMR (126 MHz,  $\text{DMSO}-d_6$ )

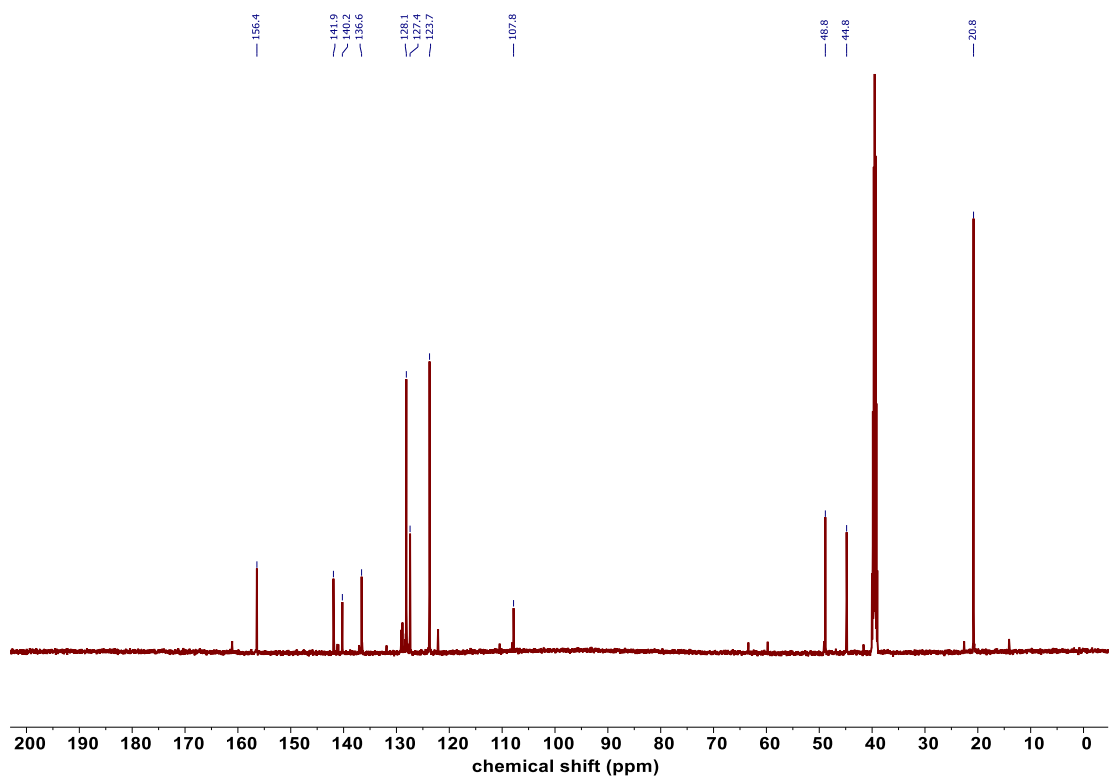

26,  $^1\text{H}$  NMR (500 MHz,  $\text{DMSO-}d_6$ )

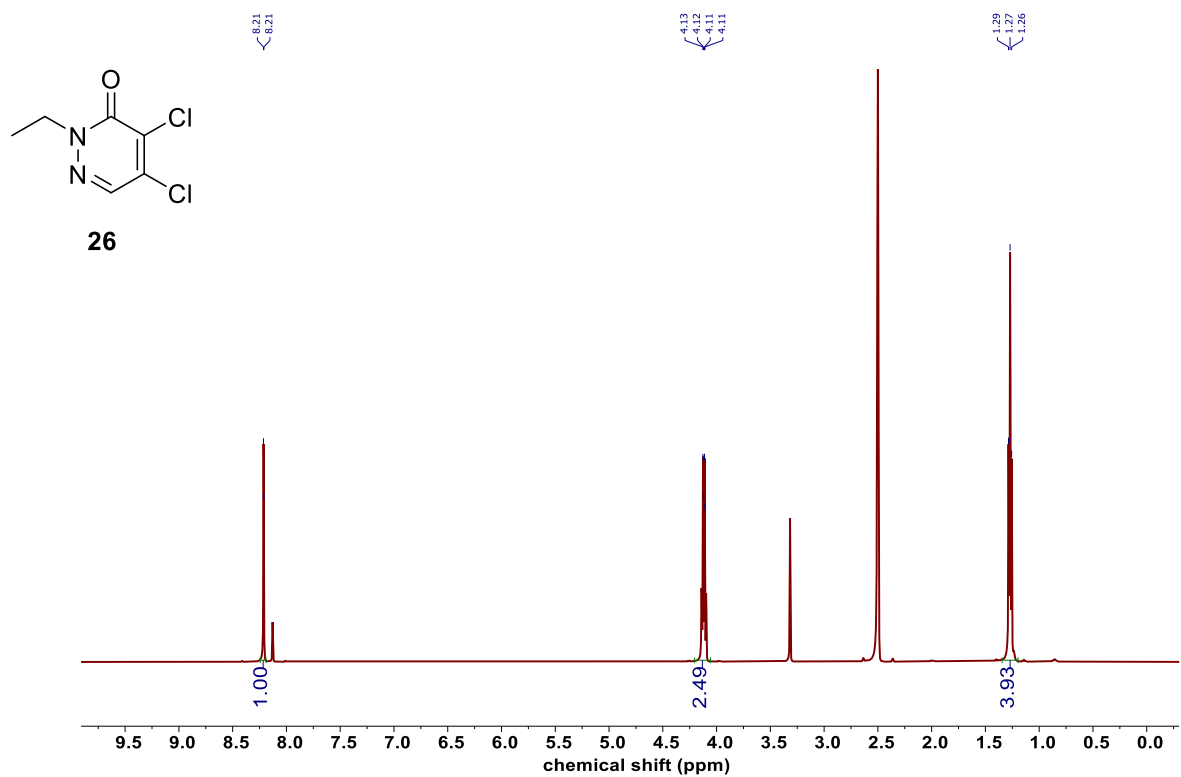

26,  $^{13}\text{C}$  NMR (126 MHz,  $\text{DMSO-}d_6$ )

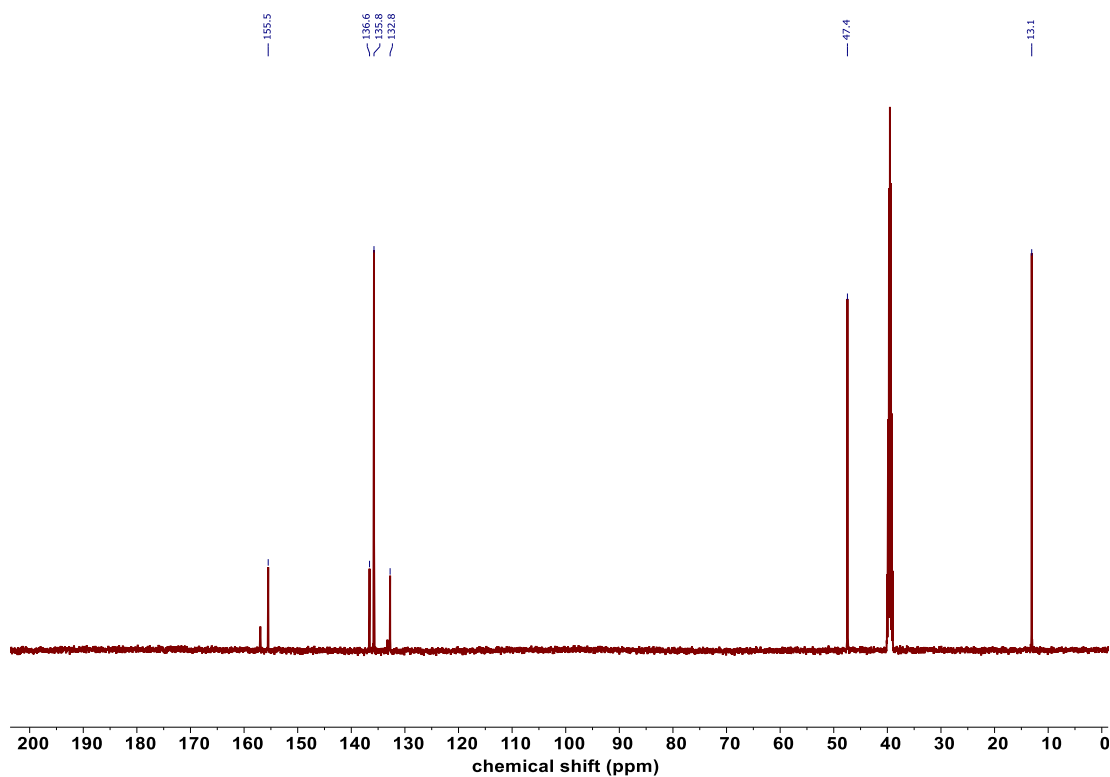



27,  $^1\text{H}$  NMR (500 MHz,  $\text{DMSO-}d_6$ )

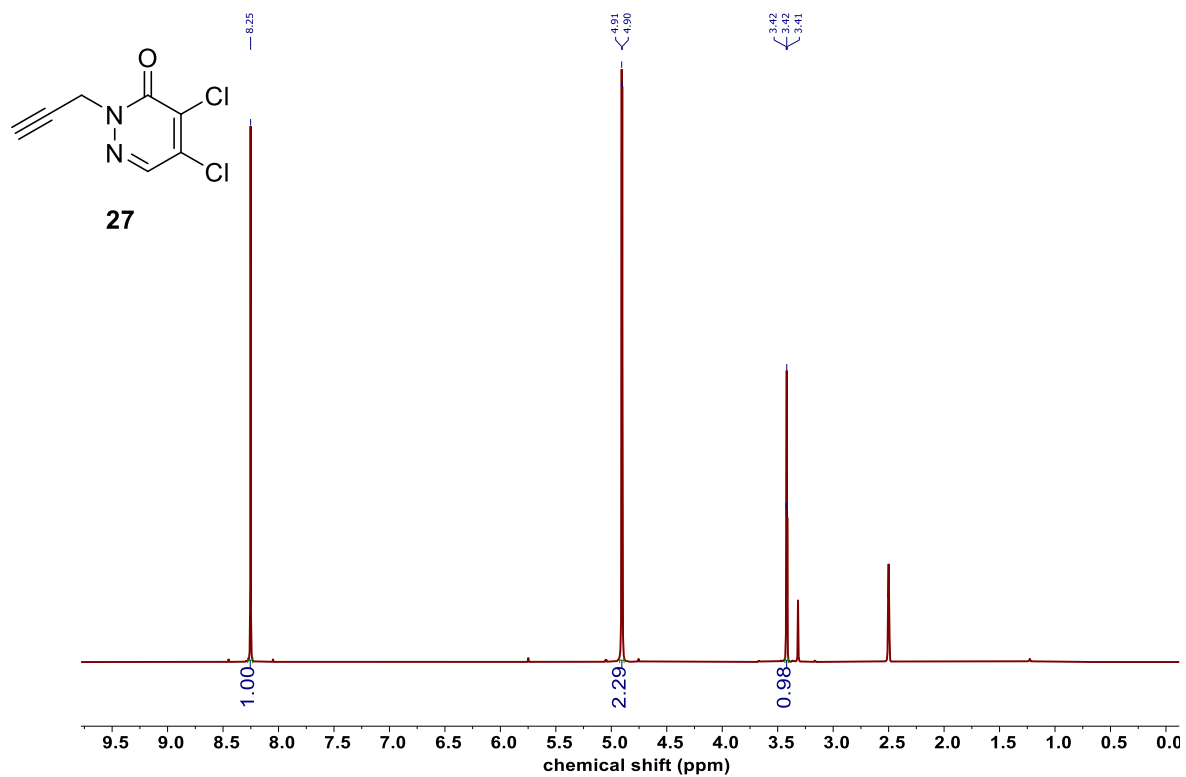

27,  $^{13}\text{C}$  NMR (126 MHz,  $\text{DMSO-}d_6$ )

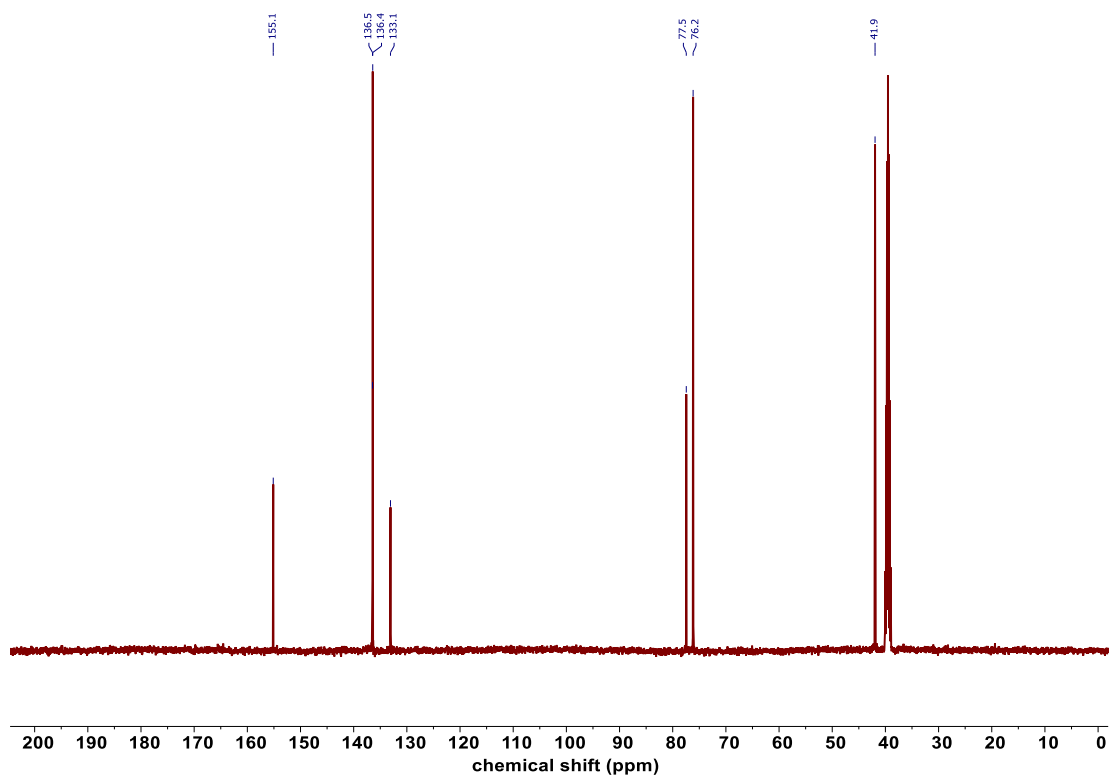

**28**,  $^1\text{H}$  NMR (500 MHz,  $\text{DMSO-}d_6$ )

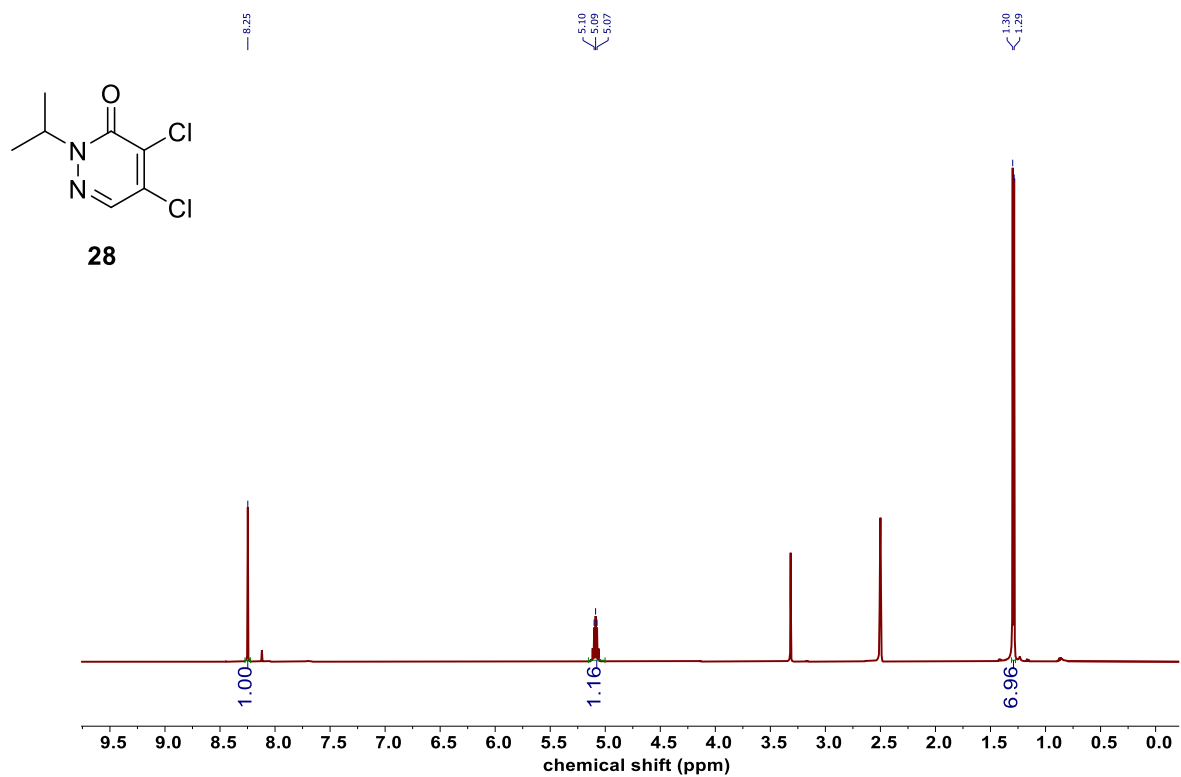

**28**,  $^{13}\text{C}$  NMR (126 MHz,  $\text{DMSO-}d_6$ )

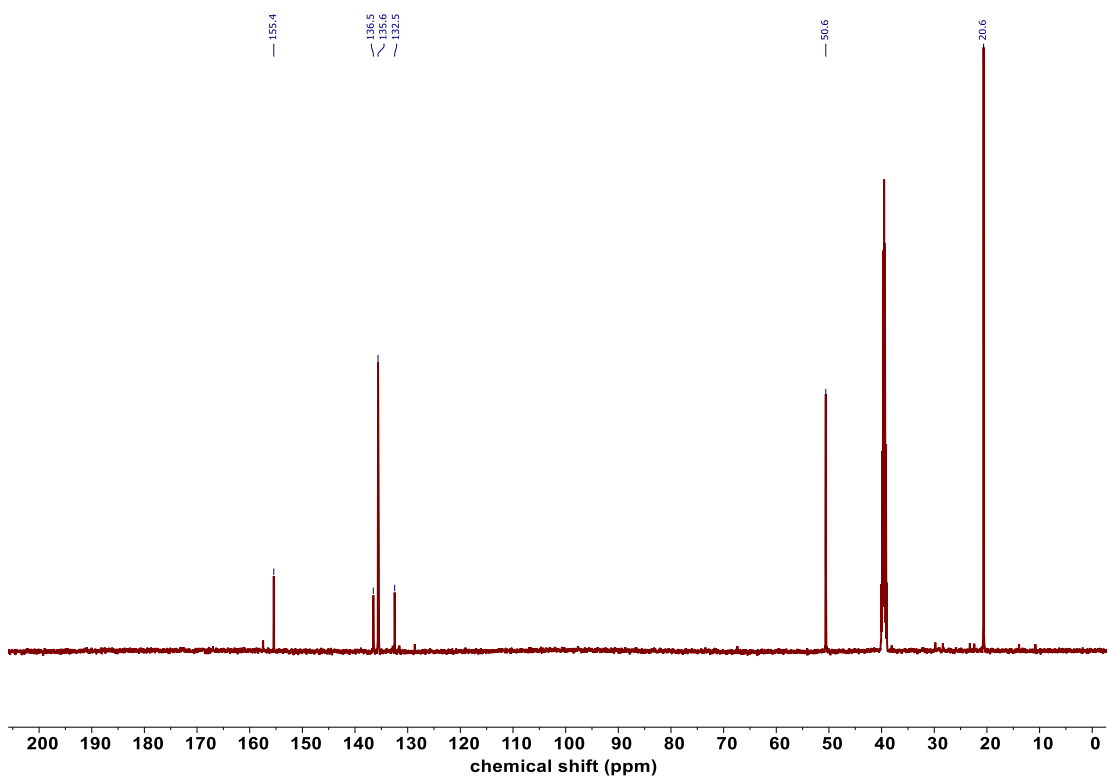

## References

- (1) Mayes, K.; Alkhatib, S. G.; Peterson, K.; Alhazmi, A.; Song, C.; Chan, V.; Blevins, T.; Roberts, M.; Dumur, C. I.; Wang, X.-Y.; Landry, J. W. BPTF Depletion Enhances T-Cell-Mediated Antitumor Immunity. *Cancer Res.* **2016**, *76* (21), 6183–6192.
- (2) Frey, W. D.; Chaudhry, A.; Slepicka, P. F.; Ouellette, A. M.; Kirberger, S. E.; Pomerantz, W. C. K.; Hannon, G. J.; dos Santos, C. O. BPTF Maintains Chromatin Accessibility and the Self-Renewal Capacity of Mammary Gland Stem Cells. *Stem Cell Reports* **2017**, *9* (1), 23–31.
